# Supplementary material for: Annexin A7 is required for ESCRT III-mediated plasma membrane repair
Source: PubMed Central journal article supplement (PMC6491720; doi:10.1038/s41598-019-43143-4), 2019-04-30
Supplement: 41598_2019_43143_MOESM1_ESM.pdf [file 41598_2019_43143_MOESM1_ESM.pdf]

## SUPPLEMENTARY INFORMATION

### **Annexin A7 is required for ESCRT III-mediated plasma membrane repair**

#### Authors:

Stine Lauritzen Sønder<sup>1</sup>, Theresa Louise Boye<sup>1</sup>, Regine Tölle<sup>2,3</sup>, Jörn Dengjel<sup>2,3</sup>, Kenji Maeda<sup>1</sup>, Marja Jäättelä<sup>1,4</sup>, Adam Cohen Simonsen<sup>5</sup>, Jyoti K. Jaiswal<sup>6,7</sup>, and Jesper Nylandsted<sup>1,4\*</sup>.

#### Affiliations:

<sup>1</sup>Unit for Cell Death and Metabolism, Center for Autophagy, Recycling and Disease, Danish Cancer Society Research Center, Strandboulevarden 49, DK-2100 Copenhagen, Denmark.

<sup>2</sup>Department of Dermatology, Medical Center, University of Freiburg, 79104 Freiburg, Germany.

<sup>3</sup>Department of Biology, University of Fribourg Chemin du Musée 10, 1700 Fribourg, Switzerland.

<sup>4</sup>Department of Cellular and Molecular Medicine, Faculty of Health Sciences, University of Copenhagen, DK-2200 Copenhagen N, Denmark.

<sup>5</sup>Department of Physics, Chemistry and Pharmacy, University of Southern Denmark, Campusvej 55, DK-5230 Odense M. Denmark.

<sup>6</sup>Children's National Health System, Center for Genetic Medicine Research, and

<sup>7</sup>Department of Genomics and Precision Medicine, George Washington University School of Medicine and Health Sciences, 111 Michigan Avenue, NW, Washington, DC 20010-2970, USA.

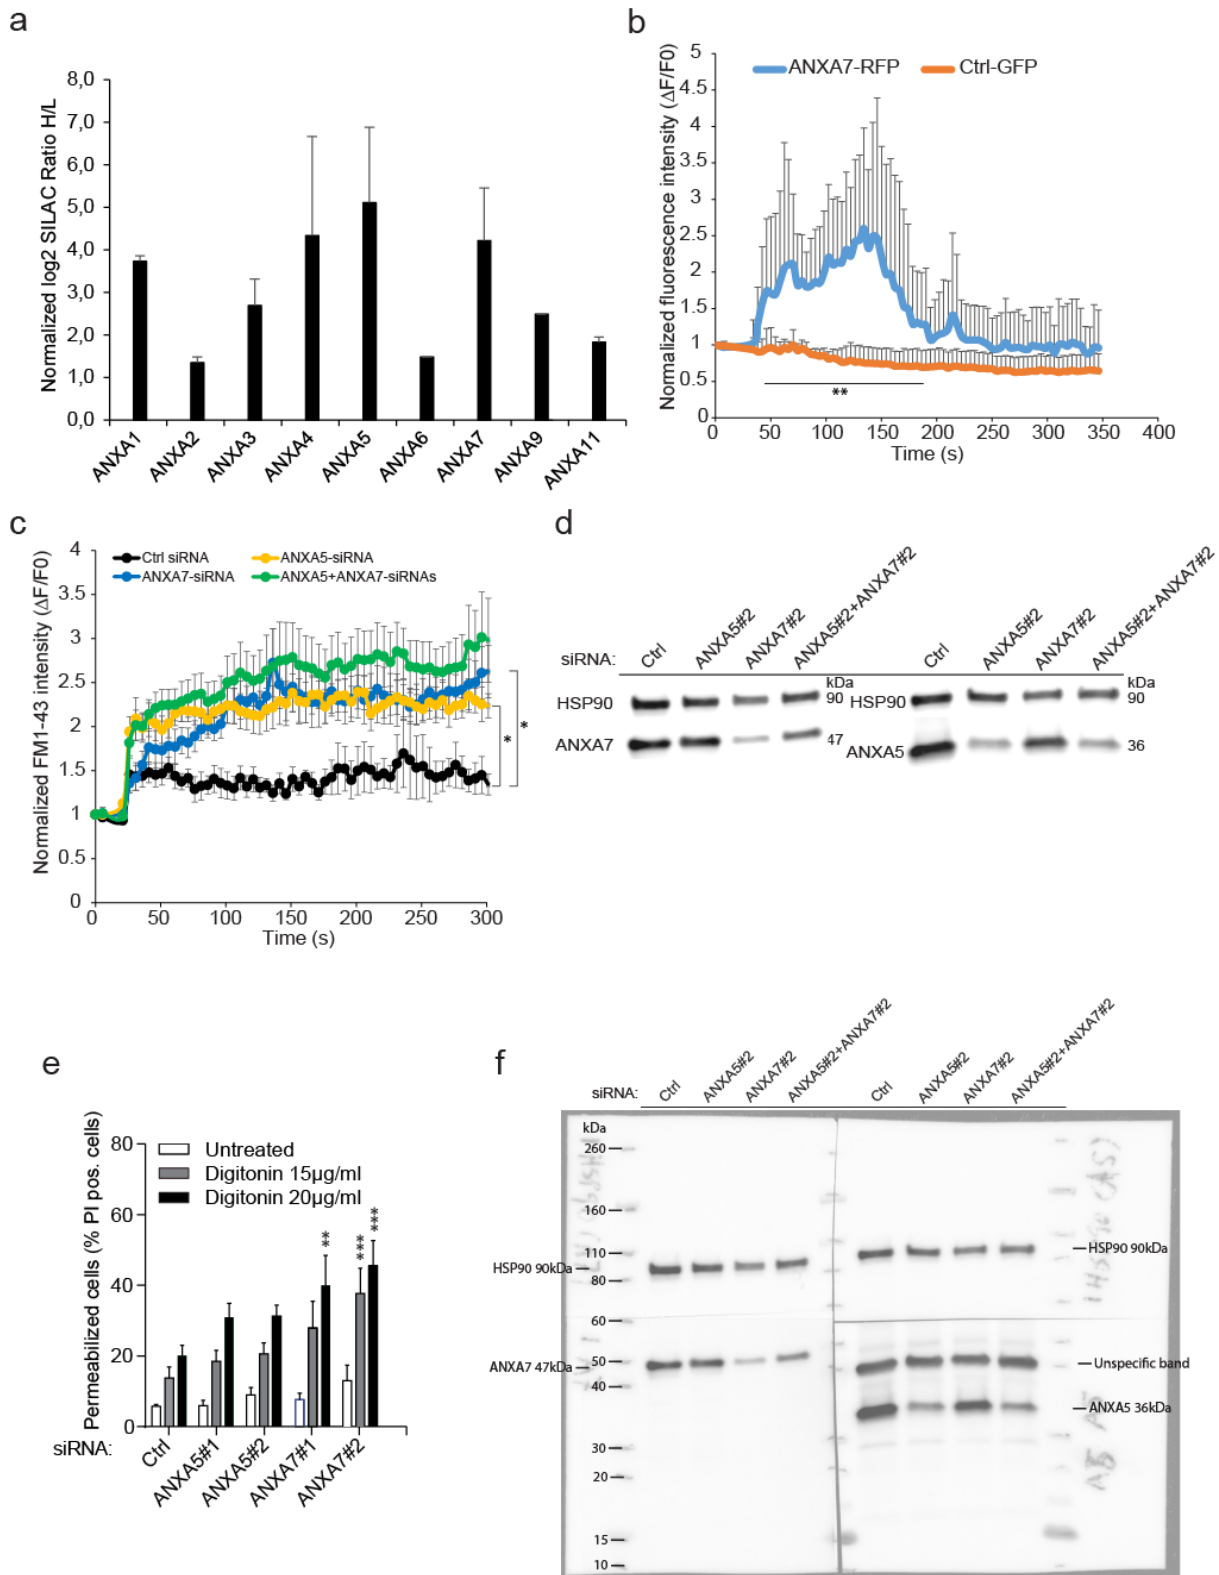

**Supplementary Figure 1 (a)** Plot showing average plasma membrane ratios of detected annexin proteins upon digitonin treatment as compared to non-injured cells in MCF7-p95ErbB2 as measured by quantitative MS. Error bars represent SD for two independent

experiments. **(b)** Kinetics of ANXA7-RFP and Control-GFP translocation to damaged plasma membrane in response to focal laser injury in MCF7-p95ErbB2 cells. Error bars represent SD from six independent cells per condition. **(c)** Plasma membrane repair kinetics upon laser injury measured by membrane impermeable FM1-43 dye influx in MCF7-p95ErbB2 transfected with Ctrl, ANXA5, ANXA7 or ANXA5 and ANXA7 siRNAs for 72 h. Error bars represent SEM for at least 7 independent cells per condition. P-values based on Student's t-test: \*P ≤ 0.05, \*\*P ≤ 0.01

**(d)** Corresponding immunoblots showing protein levels of ANXA5, ANXA7 upon siRNA transfection (72 h) in MCF7-p95ErbB2 cells. HSP90 served as internal loading control **(e)** MCF7-p95ErbB2 cells transfected with indicated siRNAs for 72 h and treated with digitonin at the indicated concentrations for 1h at 37 °C. Plasma membrane integrity was measured by propidium iodide exclusion assay. Error bars indicate SD of three independent experiments. The asterisk represent P-values based on 2way Anova test: \*\*P ≤ 0.01, \*\*\*P ≤ 0.001, as indicated when comparing indicated siRNAs to control siRNA. **(f)** Complete blot for d.

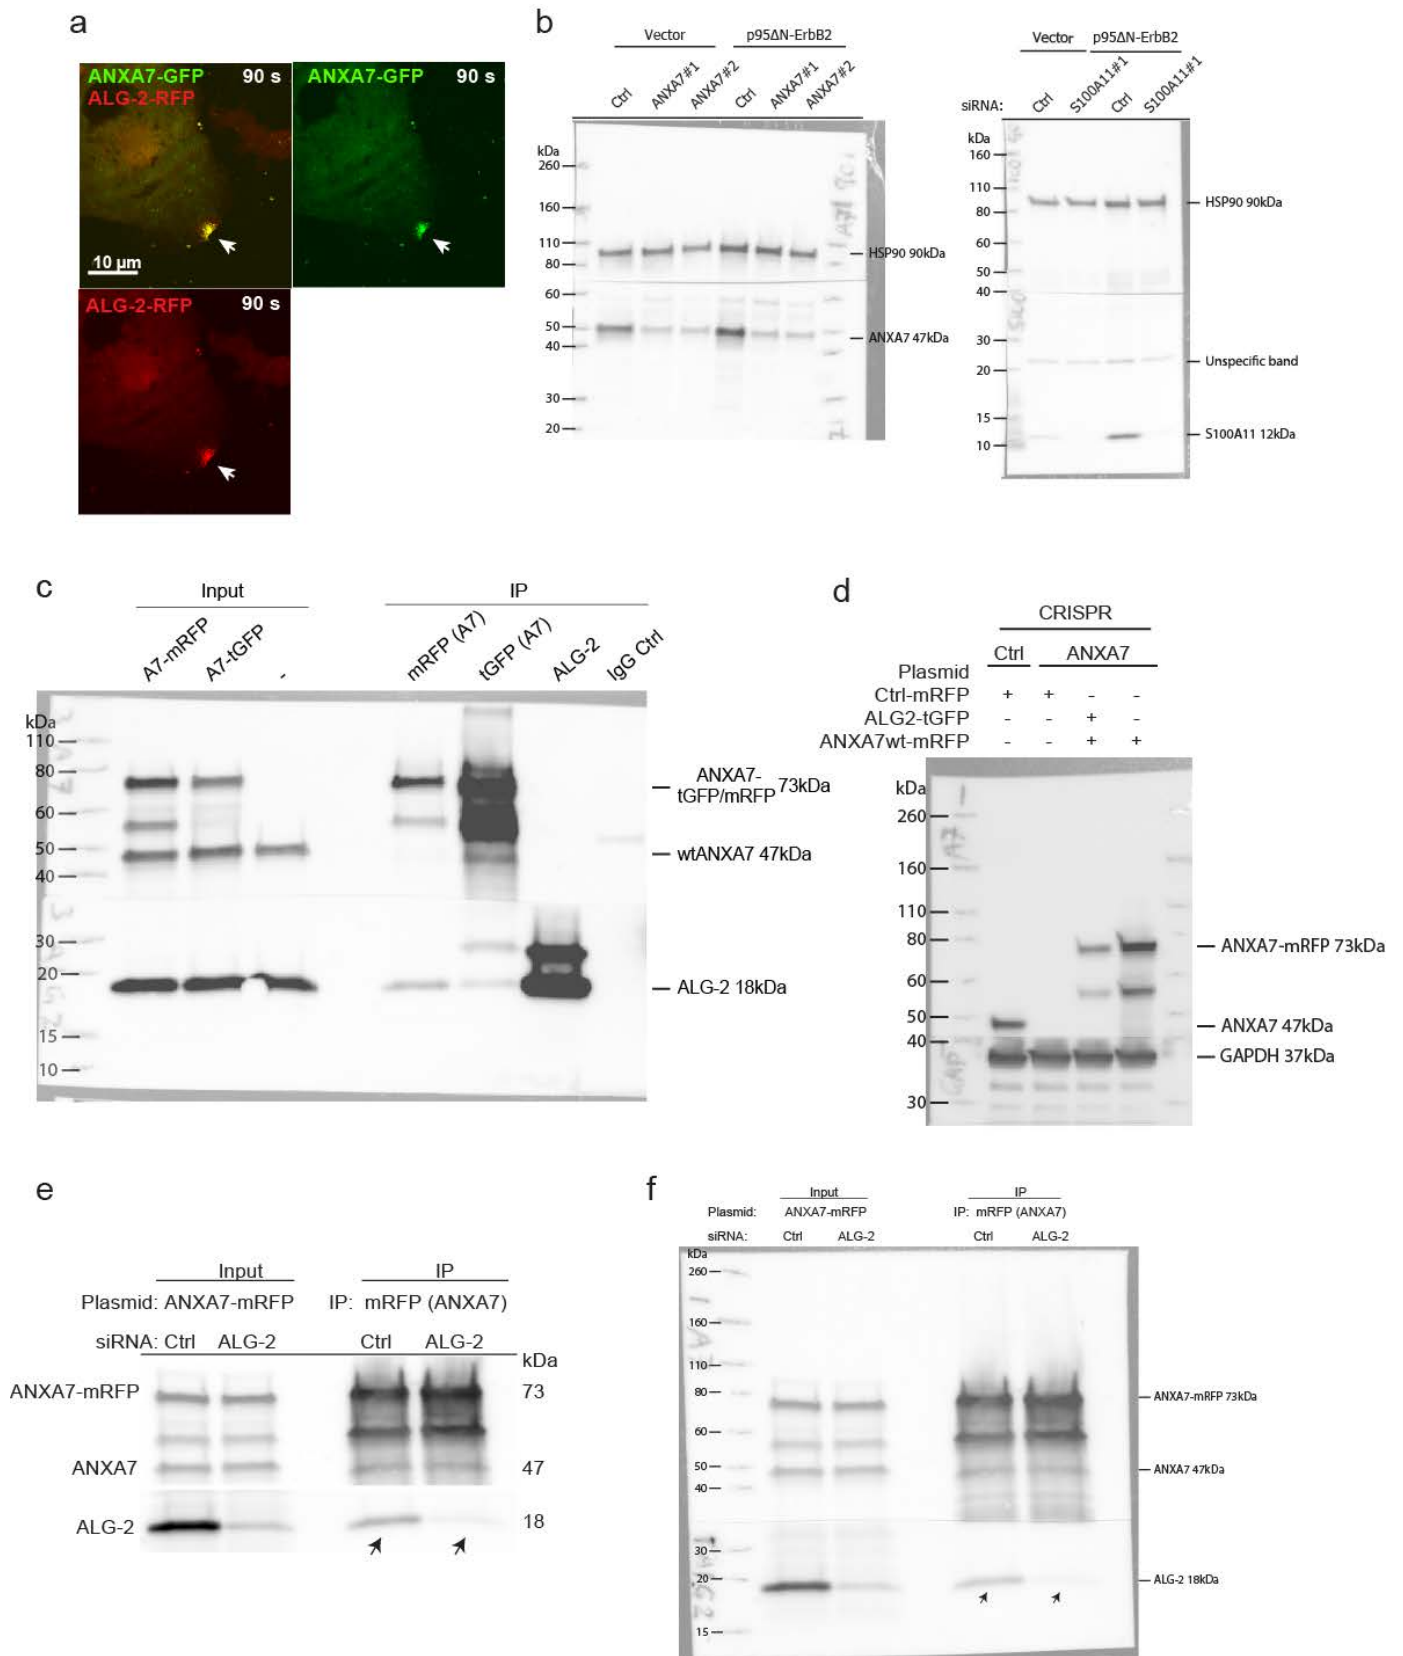

**Supplementary Figure 2 (a)** Extended confocal images (from Fig. 2a) of MCF7-p95ErbB2 cell expressing ALG-2-RFP and ANXA7-GFP captured after laser injury (90 s) shown in respective channels (white arrow indicates injury site) **(b)** Complete blot of Fig. 1f showing

protein levels of ANXA7 and S100A11 in MCF7 Vector Control and MCF7-p95ErbB2 cells. (c) Complete blot for Fig. 2c (d) Representative immunoblots showing protein levels in MCF7-p95ErbB2 Ctrl-CRISPR or A7-CRISPR cells 24h after transfection with ANXA7-RFP Ctrl-RFP or ANXA7-RFP and ALG-2-GFP. (e) Representative immunoprecipitation experiment using mRFP-antibody from lysates of MCF7-p95ErbB2 cells. Cells overexpressing ANXA7-mRFP were depleted for ALG-2 or not (Ctrl) by siRNA and exposed to scrape injury. Following IP, immunoblot analysis was carried out using ANXA7 and ALG-2 antibodies. (f) Complete blot of e.

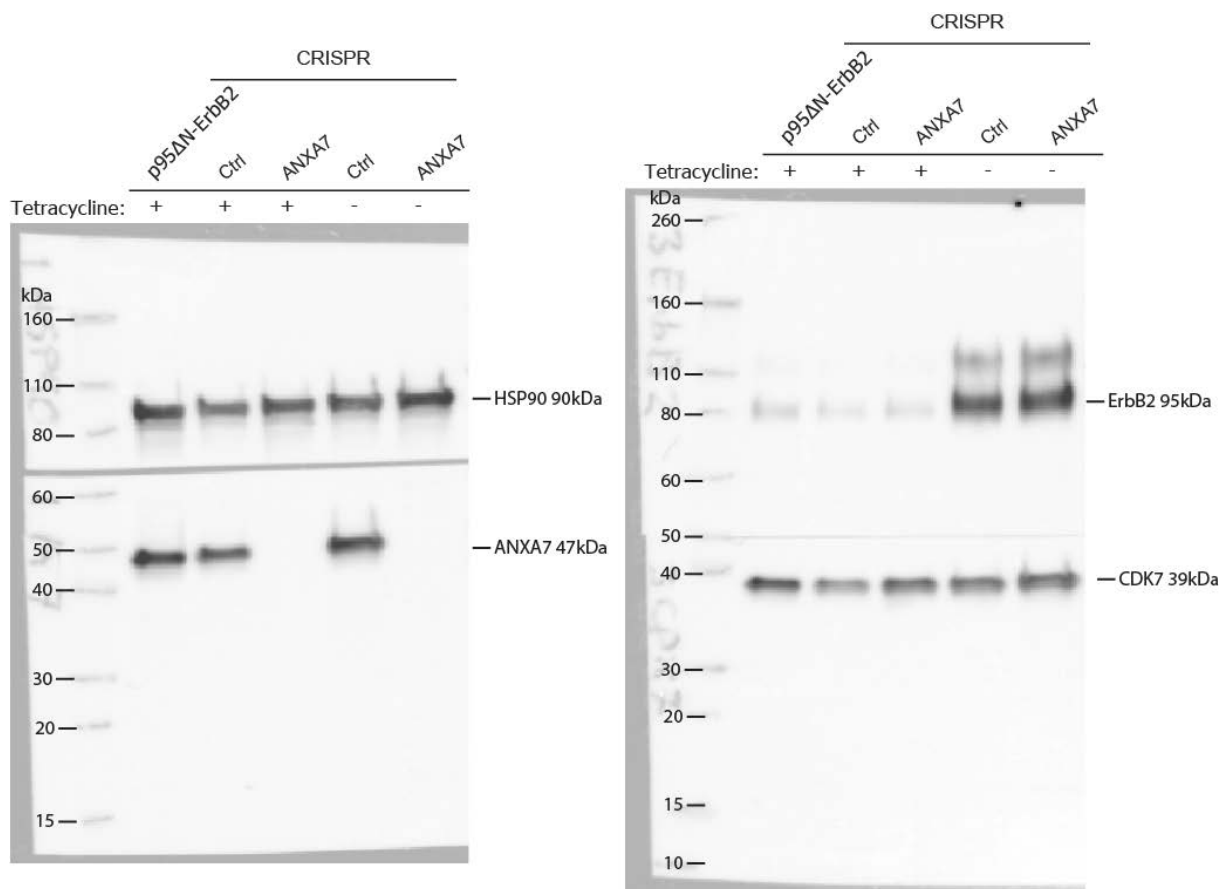

**Supplementary Figure 3** Complete blot of Fig. 2f.

#### MOVIE LEGENDS

**Supplementary Movie S1** ANXA7-RFP and ALG-2-GFP co-accumulate at the damaged membrane upon laser injury of MCF7-p95ErbB2 cell (Related to Fig. 2a). Scale bar, 10  $\mu$ m.

**Supplementary Movie S2** ANXA7 induces change in supported membrane conformation resulting in pearl-like structures in the patch periphery and contraction of membrane patch area (Related to Fig. 3b). Scale bar, 50  $\mu$ m.

**Supplementary Movie S3** ANXA7-RFP/ALG-2-GFP complex translocate to damaged membrane upon laser injury in MCF7-p95ErbB2 A7-CRISPR cell and trigger excision and shedding of membrane containing protrusions (Related to Fig. 4g). Scale bar, 3  $\mu$ m.

**Supplementary Movie S4** Representative Movie of ANXA7-RFP and ALG-2-GFP translocation and co-accumulation to damaged membrane upon laser injury in MCF7-p95ErbB2 A7-CRISPR cell and subsequent shedding of damaged membrane (Related to Fig. 4). Scale bar, 3  $\mu$ m.

**Supplementary Movie S5** Movie of ANXA7-RFP and ALG-2-GFP translocation and co-accumulation to damaged membrane after plasma membrane laser injury in MCF7-p95ErbB2 A7-CRISPR cell and subsequent shedding of damaged membrane (Related to Fig. 4a-c). Scale bar, 3  $\mu$ m

**Supplementary Table 1** Proteins associated with the plasma membrane in MCF7-p95ErbB2 cells exposed to digitonin as quantified by the SILAC method using MS.

Supplementary Table 1: Proteins associated with the plasma membrane in MCF7-p95ErbB2 cells as quantified by the SILAC method using MS.

| No. | Protein ID | Protein name                                                            | Gene name | No. of proteins<br>a) | Seq. Pep.<br>b) | Seq. Cov.<br>% <sup>c)</sup> | ErbB2-digi<br>/ErbB2 <sup>d)</sup> | Var. % <sup>e)</sup> |
|-----|------------|-------------------------------------------------------------------------|-----------|-----------------------|-----------------|------------------------------|------------------------------------|----------------------|
| 1   | Q9UKD2     | mRNA turnover protein 4 homolog                                         | MRT04     | 1                     | 3               | 15.5                         | 4.368                              | 128.32               |
| 2   | Q99829     | Copine-1                                                                | CPNE1     | 18                    | 9               | 15.2                         | 4.324                              | 22.55                |
| 3   | P46060     | Ran GTPase-activating protein 1                                         | RANGAP1   | 5                     | 3               | 7.5                          | 4.222                              | 122.55               |
| 4   | P08758     | Annexin A5                                                              | ANXA5     | 5                     | 23              | 69.7                         | 3.864                              | 51.81                |
| 5   | O15091     | Mitochondrial ribonuclease P protein 3                                  | KIAA0391  | 4                     | 3               | 6.9                          | 3.696                              | 121.84               |
| 6   | P04083     | Annexin A1                                                              | ANXA1     | 3                     | 12              | 38.7                         | 3.643                              | 15.70                |
| 7   | P20073     | Annexin A7                                                              | ANXA7     | 3                     | 15              | 43.2                         | 3.346                              | 36.24                |
| 8   | P12429     | Annexin A3                                                              | ANXA3     | 6                     | 13              | 40.6                         | 3.133                              | 19.42                |
| 9   | P09525     | Annexin A4                                                              | ANXA4     | 3                     | 16              | 48.2                         | 2.696                              | 19.74                |
| 10  | O14929     | Histone acetyltransferase type B catalytic subunit                      | HAT1      | 2                     | 3               | 11.4                         | 2.549                              | 26.82                |
| 11  | Q08209     | Serine/threonine-protein phosphatase 2B catalytic subunit alpha isoform | PPP3CA    | 16                    | 4               | 17.6                         | 2.491                              | 12.03                |
| 12  | Q13616     | Cullin-1                                                                | CUL1      | 1                     | 2               | 2.4                          | 2.371                              | 96.90                |
| 13  | O14979     | Heterogeneous nuclear ribonucleoprotein D-like                          | HNRNPDL   | 3                     | 3               | 13.9                         | 2.355                              | 148.50               |
| 14  | P05455     | Lupus La protein                                                        | SSB       | 4                     | 13              | 31.4                         | 2.340                              | 12.15                |
| 15  | P49748     | Very long-chain specific acyl-CoA dehydrogenase, mitochondrial          | ACADVL    | 11                    | 16              | 31.4                         | 2.301                              | 23.62                |
| 16  | Q9H1K4     | Mitochondrial glutamate carrier 1                                       | SLC25A22  | 12                    | 3               | 12.2                         | 2.279                              | 5.70                 |
| 17  | P49321     | Nuclear autoantigenic sperm protein                                     | NASP      | 11                    | 11              | 20.4                         | 2.276                              | 9.18                 |
| 18  | H7C466     | Zinc finger CCCH domain-containing protein 15                           | ZC3H15    | 1                     | 2               | 29.6                         | 2.259                              | 34.30                |
| 19  | O60313     | Dynamin-like 120 kDa protein, mitochondrial                             | OPA1      | 9                     | 11              | 14.6                         | 2.239                              | 15.06                |
| 20  | Q6NUK1     | Calcium-binding mitochondrial carrier protein SCaMC-1                   | SLC25A24  | 3                     | 15              | 36.0                         | 2.214                              | 27.39                |
| 21  | Q9H3K2     | Growth hormone-inducible transmembrane protein                          | GHITM     | 2                     | 2               | 6.5                          | 2.171                              | 120.37               |
| 22  | Q9NVI7     | ATPase family AAA domain-containing protein 3A                          | ATAD3A    | 11                    | 13              | 26.1                         | 2.168                              | 26.64                |
| 23  | P57105     | Synaptojanin-2-binding protein                                          | SYNJ2BP   | 1                     | 2               | 17.2                         | 2.151                              | 9.57                 |
| 24  | Q9Y6N5     | Sulfide:quinone oxidoreductase, mitochondrial                           | SQRDL     | 6                     | 10              | 24.9                         | 2.150                              | 27.76                |
| 25  | P40939     | Trifunctional enzyme subunit alpha, mitochondrial                       | HADHA     | 3                     | 35              | 51.2                         | 2.149                              | 22.30                |
| 26  | Q08J23     | tRNA (cytosine(34)-C(5))-methyltransferase                              | NSUN2     | 3                     | 19              | 27.2                         | 2.149                              | 29.50                |
| 27  | Q96A26     | Protein FAM162A                                                         | FAM162A   | 2                     | 4               | 27.1                         | 2.084                              | 16.02                |
| 28  | O95202     | LETM1 and EF-hand domain-containing protein 1,                          | LETM1     | 3                     | 16              | 27.2                         | 2.081                              | 41.58                |



Supplementary Table 1: Continued.

| No. | Protein ID | Protein name                                                                   | Gene name | No. of proteins<br>a) | Seq. Pep.<br>b) | Seq. Cov.<br>% <sup>c)</sup> | ErbB2-digi<br>/ErbB2 <sup>d)</sup> | Var. % <sup>e)</sup> |
|-----|------------|--------------------------------------------------------------------------------|-----------|-----------------------|-----------------|------------------------------|------------------------------------|----------------------|
| 29  | P27144     | Adenylate kinase 4, mitochondrial                                              | AK4       | 2                     | 9               | 58.3                         | 2.080                              | 23.48                |
| 30  | P43246     | DNA mismatch repair protein Msh2                                               | MSH2      | 4                     | 6               | 8.3                          | 2.069                              | 44.36                |
| 31  | P07384     | Calpain-1 catalytic subunit                                                    | CAPN1     | 11                    | 19              | 27.3                         | 2.067                              | 37.96                |
| 32  | P24539     | ATP synthase F(0) complex subunit B1, mitochondrial                            | ATP5F1    | 2                     | 11              | 56.9                         | 2.064                              | 11.82                |
| 33  | Q5RI15     | Cytochrome c oxidase protein 20 homolog                                        | COX20     | 2                     | 2               | 21.2                         | 2.054                              | 45.31                |
| 34  | Q9Y4W6     | AFG3-like protein 2                                                            | AFG3L2    | 8                     | 17              | 21.0                         | 2.047                              | 16.47                |
| 35  | O15355     | Protein phosphatase 1G                                                         | PPM1G     | 1                     | 8               | 17.9                         | 2.039                              | 23.02                |
| 36  | P54886     | Delta-1-pyrroline-5-carboxylate synthase                                       | ALDH18A1  | 2                     | 24              | 35.4                         | 2.014                              | 22.54                |
| 37  | Q16891     | Mitochondrial inner membrane protein                                           | IMMT      | 8                     | 40              | 57.3                         | 2.011                              | 31.46                |
| 38  | P22695     | Cytochrome b-c1 complex subunit 2, mitochondrial                               | UQCRC2    | 6                     | 13              | 37.7                         | 2.008                              | 31.95                |
| 39  | O60701     | UDP-glucose 6-dehydrogenase                                                    | UGDH      | 7                     | 8               | 23.3                         | 1.956                              | 30.41                |
| 40  | Q9NX63     | Coiled-coil-helix-coiled-coil-helix domain-containing protein 3, mitochondrial | CHCHD3    | 5                     | 8               | 28.6                         | 1.955                              | 13.13                |
| 41  | Q9Y3D7     | Mitochondrial import inner membrane translocase subunit TIM16                  | PAM16     | 5                     | 2               | 27.2                         | 1.952                              | 15.14                |
| 42  | P12235     | ADP/ATP translocase 1                                                          | SLC25A4   | 2                     | 11              | 30.2                         | 1.910                              | 1.56                 |
| 43  | O95299     | NADH dehydrogenase [ubiquinone] 1 alpha subcomplex subunit 10, mitochondrial   | NDUFA10   | 8                     | 7               | 19.2                         | 1.902                              | 17.34                |
| 44  | Q96QD9     | UAP56-interacting factor                                                       | FYTTD1    | 7                     | 2               | 8.2                          | 1.901                              | 105.38               |
| 45  | O75131     | Copine-3                                                                       | CPNE3     | 20                    | 15              | 26.6                         | 1.870                              | 33.65                |
| 46  | P25705     | ATP synthase subunit alpha, mitochondrial                                      | ATP5A1    | 9                     | 35              | 60.9                         | 1.858                              | 27.39                |
| 47  | Q12931     | Heat shock protein 75 kDa, mitochondrial                                       | TRAP1     | 6                     | 26              | 47.0                         | 1.855                              | 27.38                |
| 48  | P42704     | Leucine-rich PPR motif-containing protein, mitochondrial                       | LRPPRC    | 8                     | 55              | 40.0                         | 1.854                              | 26.24                |
| 49  | P20674     | Cytochrome c oxidase subunit 5A, mitochondrial                                 | COX5A     | 5                     | 7               | 46.0                         | 1.854                              | 14.94                |
| 50  | P31930     | Cytochrome b-c1 complex subunit 1, mitochondrial                               | UQCRC1    | 1                     | 10              | 26.9                         | 1.843                              | 26.54                |
| 51  | Q00325     | Phosphate carrier protein, mitochondrial                                       | SLC25A3   | 6                     | 9               | 19.1                         | 1.839                              | 16.92                |
| 52  | P36542     | ATP synthase subunit gamma, mitochondrial                                      | ATP5C1    | 3                     | 9               | 28.2                         | 1.830                              | 32.22                |
| 53  | Q96BW9     | Mitochondrial translocator assembly and maintenance protein 41 homolog         | TAMM41    | 6                     | 2               | 9.2                          | 1.824                              | 14.85                |
| 54  | Q8IXI1     | Mitochondrial Rho GTPase 2                                                     | RHOT2     | 16                    | 4               | 8.4                          | 1.814                              | 13.46                |

Supplementary Table 1: Continued.

| No. | Protein ID | Protein name                                                                                             | Gene name | No. of proteins<br>a) | Seq. Pep.<br>b) | Seq. Cov.<br>% <sup>c)</sup> | ErbB2-digi<br>/ErbB2 <sup>d)</sup> | Var. % <sup>e)</sup> |
|-----|------------|----------------------------------------------------------------------------------------------------------|-----------|-----------------------|-----------------|------------------------------|------------------------------------|----------------------|
| 55  | P35579     | Myosin-9                                                                                                 | MYH9      | 2                     | 25              | 14.8                         | 1.811                              | 26.79                |
| 56  | O95182     | NADH dehydrogenase [ubiquinone] 1 alpha subcomplex subunit 7                                             | NDUFA7    | 1                     | 2               | 16.8                         | 1.811                              | 29.99                |
| 57  | P55084     | Trifunctional enzyme subunit beta, mitochondrial                                                         | HADHB     | 7                     | 27              | 57.3                         | 1.805                              | 45.29                |
| 58  | P07741     | Adenine phosphoribosyltransferase                                                                        | APRT      | 6                     | 10              | 52.8                         | 1.800                              | 67.52                |
| 59  | Q9UIJ7     | GTP:AMP phosphotransferase AK3, mitochondrial                                                            | AK3       | 3                     | 6               | 30.4                         | 1.793                              | 14.60                |
| 60  | P47985     | Cytochrome b-c1 complex subunit Rieske, mitochondrial                                                    | UQCRCF1   | 2                     | 8               | 27.4                         | 1.792                              | 22.17                |
| 61  | P43304     | Glycerol-3-phosphate dehydrogenase, mitochondrial                                                        | GPD2      | 6                     | 27              | 41.3                         | 1.788                              | 30.42                |
| 62  | P56134     | ATP synthase subunit f, mitochondrial                                                                    | ATP5J2    | 8                     | 2               | 49.0                         | 1.774                              | 13.34                |
| 63  | O94925     | Glutaminase kidney isoform, mitochondrial                                                                | GLS       | 4                     | 6               | 14.7                         | 1.749                              | 35.90                |
| 64  | P50995     | Annexin A11                                                                                              | ANXA11    | 7                     | 11              | 23.3                         | 1.748                              | 10.23                |
| 65  | P49915     | GMP synthase [glutamine-hydrolyzing]                                                                     | GMPS      | 2                     | 8               | 15.0                         | 1.745                              | 37.28                |
| 66  | P12236     | ADP/ATP translocase 3                                                                                    | SLC25A6   | 3                     | 16              | 41.9                         | 1.743                              | 20.25                |
| 67  | O00217     | NADH dehydrogenase [ubiquinone] iron-sulfur protein 8, mitochondrial                                     | NDUFS8    | 5                     | 2               | 19.1                         | 1.738                              | 15.50                |
| 68  | P48047     | ATP synthase subunit O, mitochondrial                                                                    | ATP5O     | 4                     | 10              | 55.4                         | 1.737                              | 17.52                |
| 69  | Q7L0Y3     | Mitochondrial ribonuclease P protein 1                                                                   | TRMT10C   | 2                     | 3               | 9.7                          | 1.728                              | 8.84                 |
| 70  | P28331     | NADH-ubiquinone oxidoreductase 75 kDa subunit, mitochondrial                                             | NDUFS1    | 7                     | 16              | 33.7                         | 1.726                              | 28.57                |
| 71  | Q9HCC0     | Methylcrotonoyl-CoA carboxylase beta chain, mitochondrial                                                | MCCC2     | 5                     | 17              | 36.1                         | 1.725                              | 19.44                |
| 72  | Q9Y383     | Putative RNA-binding protein Luc7-like 2                                                                 | LUC7L2    | 4                     | 2               | 6.9                          | 1.724                              | 15.79                |
| 73  | Q96HS1     | Serine/threonine-protein phosphatase PGAM5, mitochondrial                                                | PGAM5     | 3                     | 10              | 34.9                         | 1.715                              | 65.74                |
| 74  | Q9UHQ9     | NADH-cytochrome b5 reductase 1                                                                           | CYB5R1    | 2                     | 9               | 26.9                         | 1.715                              | 21.47                |
| 75  | P10515     | Dihydrolipoyllysine-residue acetyltransferase component of pyruvate dehydrogenase complex, mitochondrial | DLAT      | 4                     | 7               | 15.9                         | 1.712                              | 19.76                |
| 76  | P08574     | Cytochrome c1, heme protein, mitochondrial                                                               | CYC1      | 1                     | 8               | 31.1                         | 1.711                              | 36.70                |
| 77  | Q9NQX4     | Unconventional myosin-Vc                                                                                 | MYO5C     | 6                     | 14              | 9.1                          | 1.709                              | 79.07                |

Supplementary Table 1: Continued.

| No. | Protein ID | Protein name                                                             | Gene name | No. of proteins<br>a) | Seq.<br>Pep. b) | Seq. Cov.<br>% c) | ErbB2-digi<br>/ErbB2 d) | Var. % e) |
|-----|------------|--------------------------------------------------------------------------|-----------|-----------------------|-----------------|-------------------|-------------------------|-----------|
| 78  | Q9UJS0     | Calcium-binding mitochondrial carrier protein Aralar2                    | SLC25A13  | 4                     | 23              | 48.3              | 1.706                   | 24.75     |
| 79  | P06702     | Protein S100-A9                                                          | S100A9    | 1                     | 7               | 52.6              | 1.705                   | 16.01     |
| 80  | Q9NQG5     | Regulation of nuclear pre-mRNA domain-containing protein 1B              | RPRD1B    | 2                     | 3               | 11.0              | 1.702                   | 5.52      |
| 81  | P30049     | ATP synthase subunit delta, mitochondrial                                | ATP5D     | 1                     | 3               | 17.3              | 1.701                   | 6.92      |
| 82  | P31040     | Succinate dehydrogenase [ubiquinone] flavoprotein subunit, mitochondrial | SDHA      | 4                     | 5               | 11.0              | 1.694                   | 20.81     |
| 83  | O75947     | ATP synthase subunit d, mitochondrial                                    | ATP5H     | 3                     | 11              | 73.9              | 1.694                   | 22.94     |
| 84  | P05141     | ADP/ATP translocase 2                                                    | SLC25A5   | 1                     | 15              | 36.9              | 1.687                   | 18.97     |
| 85  | P13073     | Cytochrome c oxidase subunit 4 isoform 1, mitochondrial                  | COX4I1    | 6                     | 11              | 55.0              | 1.683                   | 27.11     |
| 86  | P51648     | Fatty aldehyde dehydrogenase                                             | ALDH3A2   | 7                     | 4               | 13.7              | 1.682                   | 146.17    |
| 87  | O96000     | NADH dehydrogenase [ubiquinone] 1 beta subcomplex subunit 10             | NDUFB10   | 4                     | 6               | 37.2              | 1.681                   | 18.02     |
| 88  | Q9BPW8     | Protein NipSnap homolog 1                                                | NIPSNAP1  | 4                     | 4               | 21.8              | 1.681                   | 25.31     |
| 89  | P14927     | Cytochrome b-c1 complex subunit 7                                        | UQCRB     | 4                     | 5               | 45.0              | 1.680                   | 4.18      |
| 90  | P52789     | Hexokinase-2                                                             | HK2       | 5                     | 16              | 19.0              | 1.668                   | 11.67     |
| 91  | P19367     | Hexokinase-1                                                             | HK1       | 9                     | 28              | 30.6              | 1.668                   | 18.40     |
| 92  | Q9Y3D9     | 28S ribosomal protein S23, mitochondrial                                 | MRPS23    | 2                     | 4               | 26.3              | 1.658                   | 11.35     |
| 93  | Q9Y2R9     | 28S ribosomal protein S7, mitochondrial                                  | MRPS7     | 5                     | 3               | 20.2              | 1.657                   | 1.84      |
| 94  | Q9Y2Q3     | Glutathione S-transferase kappa 1                                        | GSTK1     | 5                     | 2               | 16.4              | 1.657                   | 8.36      |
| 95  | Q9P258     | Protein RCC2                                                             | RCC2      | 1                     | 7               | 13.4              | 1.654                   | 14.62     |
| 96  | P21796     | Voltage-dependent anion-selective channel protein 1                      | VDAC1     | 2                     | 17              | 69.6              | 1.654                   | 25.17     |
| 97  | Q9H845     | Acyl-CoA dehydrogenase family member 9, mitochondrial                    | ACAD9     | 3                     | 6               | 10.6              | 1.646                   | 36.03     |
| 98  | O94826     | Mitochondrial import receptor subunit TOM70                              | TOMM70A   | 1                     | 18              | 38.2              | 1.633                   | 37.57     |
| 99  | O43615     | Mitochondrial import inner membrane translocase subunit TIM44            | TIMM44    | 5                     | 8               | 21.5              | 1.631                   | 29.41     |
| 100 | P31949     | Protein S100-A11                                                         | S100A11   | 1                     | 4               | 41.9              | 1.631                   | 66.10     |
| 101 | P06576     | ATP synthase subunit beta, mitochondrial                                 | ATP5B     | 6                     | 28              | 75.4              | 1.625                   | 23.59     |
| 102 | P54819     | Adenylate kinase 2, mitochondrial                                        | AK2       | 11                    | 11              | 65.9              | 1.616                   | 25.57     |

Supplementary Table 1: Continued.

| No. | Protein ID | Protein name                                                  | Gene name | No. of proteins<br>a) | Seq. Pep.<br>b) | Seq. Cov.<br>% <sup>c)</sup> | ErbB2-digi<br>/ErbB2 <sup>d)</sup> | Var. % <sup>e)</sup> |
|-----|------------|---------------------------------------------------------------|-----------|-----------------------|-----------------|------------------------------|------------------------------------|----------------------|
| 103 | Q96RQ3     | Methylcrotonoyl-CoA carboxylase subunit alpha, mitochondrial  | MCCC1     | 6                     | 18              | 31.0                         | 1.612                              | 23.54                |
| 104 | P35232     | Prohibitin                                                    | PHB       | 7                     | 19              | 75.4                         | 1.610                              | 15.90                |
| 105 | P62258     | 14-3-3 protein epsilon                                        | YWHAE     | 7                     | 15              | 54.9                         | 1.610                              | 102.08               |
| 106 | O75431     | Metaxin-2                                                     | MTX2      | 4                     | 3               | 21.7                         | 1.604                              | 6.12                 |
| 107 | O95168     | NADH dehydrogenase [ubiquinone] 1 beta subcomplex subunit 4   | NDUFB4    | 4                     | 5               | 48.1                         | 1.597                              | 98.93                |
| 108 | P13010     | X-ray repair cross-complementing protein 5                    | XRCC5     | 3                     | 29              | 49.6                         | 1.594                              | 19.92                |
| 109 | Q9NZZ2     | Opioid growth factor receptor                                 | OGFR      | 2                     | 3               | 8.1                          | 1.593                              | 26.16                |
| 110 | P10606     | Cytochrome c oxidase subunit 5B, mitochondrial                | COX5B     | 1                     | 5               | 35.7                         | 1.590                              | 13.63                |
| 111 | P52701     | DNA mismatch repair protein Msh6                              | MSH6      | 6                     | 17              | 18.4                         | 1.589                              | 89.85                |
| 112 | P17568     | NADH dehydrogenase [ubiquinone] 1 beta subcomplex subunit 7   | NDUFB7    | 1                     | 3               | 19.7                         | 1.589                              | 22.16                |
| 113 | P19404     | NADH dehydrogenase [ubiquinone] flavoprotein 2, mitochondrial | NDUFV2    | 2                     | 4               | 21.7                         | 1.585                              | 29.55                |
| 114 | O43920     | NADH dehydrogenase [ubiquinone] iron-sulfur protein 5         | NDUFS5    | 1                     | 2               | 17.9                         | 1.583                              | 0.52                 |
| 115 | P04632     | Calpain small subunit 1                                       | CAPNS1    | 10                    | 8               | 55.6                         | 1.575                              | 34.94                |
| 116 | P45880     | Voltage-dependent anion-selective channel protein 2           | VDAC2     | 7                     | 9               | 36.4                         | 1.568                              | 10.73                |
| 117 | Q6UB35     | Monofunctional C1-tetrahydrofolate synthase, mitochondrial    | MTHFD1L   | 10                    | 7               | 8.4                          | 1.563                              | 17.95                |
| 118 | P56556     | NADH dehydrogenase [ubiquinone] 1 alpha subcomplex subunit 6  | NDUFA6    | 2                     | 3               | 22.7                         | 1.556                              | 9.24                 |
| 119 | Q9H9B4     | Sideroflexin-1                                                | SFXN1     | 5                     | 12              | 44.1                         | 1.553                              | 33.65                |
| 120 | O95831     | Apoptosis-inducing factor 1, mitochondrial                    | AIFM1     | 7                     | 19              | 37.9                         | 1.550                              | 31.46                |
| 121 | Q9GZT3     | SRA stem-loop-interacting RNA-binding protein, mitochondrial  | SLIRP     | 7                     | 4               | 46.7                         | 1.547                              | 23.62                |
| 122 | O00267     | Transcription elongation factor SPT5                          | SUPT5H    | 2                     | 4               | 5.7                          | 1.542                              | 18.58                |
| 123 | Q86VP6     | Cullin-associated NEDD8-dissociated protein 1                 | CAND1     | 8                     | 27              | 24.8                         | 1.537                              | 41.56                |
| 124 | P53007     | Tricarboxylate transport protein, mitochondrial               | SLC25A1   | 2                     | 7               | 23.2                         | 1.530                              | 24.83                |
| 125 | P12956     | X-ray repair cross-complementing protein 6                    | XRCC6     | 4                     | 30              | 55.2                         | 1.526                              | 35.19                |

Supplementary Table 1: Continued.

| No. | Protein ID | Protein name                                                               | Gene name | No. of proteins<br>a) | Seq. Pep.<br>b) | Seq. Cov.<br>% <sup>c)</sup> | ErbB2-digi<br>/ErbB2 <sup>d)</sup> | Var. % <sup>e)</sup> |
|-----|------------|----------------------------------------------------------------------------|-----------|-----------------------|-----------------|------------------------------|------------------------------------|----------------------|
| 126 | P61313     | 60S ribosomal protein L15                                                  | RPL15     | 6                     | 9               | 40.7                         | 1.523                              | 35.26                |
| 127 | Q9Y2R0     | Cytochrome c oxidase assembly factor 3 homolog,<br>mitochondrial           | COA3      | 2                     | 5               | 47.2                         | 1.522                              | 22.81                |
| 128 | Q96TA2     | ATP-dependent zinc metalloprotease YME1L1                                  | YME1L1    | 6                     | 7               | 16.5                         | 1.522                              | 28.89                |
| 129 | O14925     | Mitochondrial import inner membrane translocase subunit<br>Tim23           | TIMM23    | 7                     | 3               | 16.7                         | 1.515                              | 9.58                 |
| 130 | Q99623     | Prohibitin-2                                                               | PHB2      | 9                     | 18              | 63.9                         | 1.511                              | 16.55                |
| 131 | Q9P2E9     | Ribosome-binding protein 1                                                 | RRBP1     | 21                    | 50              | 36.0                         | 1.506                              | 28.68                |
| 132 | P00403     | Cytochrome c oxidase subunit 2                                             | MT-CO2    | 1                     | 6               | 27.8                         | 1.499                              | 17.68                |
| 133 | Q92621     | Nuclear pore complex protein Nup205                                        | NUP205    | 1                     | 3               | 2.0                          | 1.495                              | 37.42                |
| 134 | Q13268     | Dehydrogenase/reductase SDR family member 2,<br>mitochondrial              | DHRS2     | 5                     | 4               | 19.6                         | 1.493                              | 21.92                |
| 135 | O76031     | ATP-dependent Clp protease ATP-binding subunit clpX-like,<br>mitochondrial | CLPX      | 1                     | 9               | 17.5                         | 1.493                              | 19.31                |
| 136 | P49411     | Elongation factor Tu, mitochondrial                                        | TUFM      | 2                     | 19              | 49.8                         | 1.490                              | 22.58                |
| 137 | O75489     | NADH dehydrogenase [ubiquinone] iron-sulfur protein 3,<br>mitochondrial    | NDUFS3    | 5                     | 7               | 35.6                         | 1.487                              | 8.29                 |
| 138 | Q5JRA6     | Melanoma inhibitory activity protein 3                                     | MIA3      | 5                     | 17              | 14.2                         | 1.484                              | 74.09                |
| 139 | P55210     | Caspase-7                                                                  | CASP7     | 2                     | 2               | 6.3                          | 1.483                              | 36.45                |
| 140 | Q05655     | Protein kinase C delta type                                                | PRKCD     | 5                     | 8               | 11.1                         | 1.476                              | 15.31                |
| 141 | P17655     | Calpain-2 catalytic subunit                                                | CAPN2     | 2                     | 2               | 2.4                          | 1.475                              | 58.54                |
| 142 | O00232     | 26S proteasome non-ATPase regulatory subunit 12                            | PSMD12    | 2                     | 9               | 23.0                         | 1.475                              | 50.63                |
| 143 | Q00059     | Transcription factor A, mitochondrial                                      | TFAM      | 3                     | 8               | 31.7                         | 1.475                              | 24.12                |
| 144 | Q6Y7W6     | PERQ amino acid-rich with GYF domain-containing protein 2                  | GIGYF2    | 9                     | 3               | 3.0                          | 1.472                              | 112.47               |
| 145 | O15118     | Niemann-Pick C1 protein                                                    | NPC1      | 3                     | 2               | 1.9                          | 1.472                              | 15.84                |
| 146 | P32322     | Pyrroline-5-carboxylate reductase 1, mitochondrial                         | PYCR1     | 14                    | 7               | 34.2                         | 1.471                              | 17.60                |
| 147 | Q9UM54     | Unconventional myosin-VI                                                   | MYO6      | 6                     | 24              | 21.9                         | 1.466                              | 33.37                |
| 148 | Q96C36     | Pyrroline-5-carboxylate reductase 2                                        | PYCR2     | 2                     | 3               | 13.8                         | 1.465                              | 28.60                |
| 149 | A0FGR8     | Extended synaptotagmin-2                                                   | ESYT2     | 7                     | 8               | 13.1                         | 1.464                              | 23.62                |
| 150 | Q9BYN8     | 28S ribosomal protein S26, mitochondrial                                   | MRPS26    | 1                     | 3               | 18.0                         | 1.462                              | 9.10                 |

Supplementary Table 1: Continued.

| No. | Protein ID | Protein name                                                                 | Gene name | No. of proteins<br>a) | Seq. Pep.<br>b) | Seq. Cov.<br>% <sup>c)</sup> | ErbB2-digi<br>/ErbB2 <sup>d)</sup> | Var. % <sup>e)</sup> |
|-----|------------|------------------------------------------------------------------------------|-----------|-----------------------|-----------------|------------------------------|------------------------------------|----------------------|
| 151 | P11498     | Pyruvate carboxylase, mitochondrial                                          | PC        | 4                     | 34              | 36.5                         | 1.460                              | 32.46                |
| 152 | Q7L2E3     | Putative ATP-dependent RNA helicase DHX30                                    | DHX30     | 4                     | 17              | 17.5                         | 1.458                              | 37.62                |
| 153 | Q8TCJ2     | Dolichyl-diphosphooligosaccharide--protein glycosyltransferase subunit STT3B | STT3B     | 1                     | 3               | 4.4                          | 1.447                              | 16.84                |
| 154 | Q14980     | Nuclear mitotic apparatus protein 1                                          | NUMA1     | 15                    | 37              | 20.5                         | 1.437                              | 38.11                |
| 155 | P22314     | Ubiquitin-like modifier-activating enzyme 1                                  | UBA1      | 7                     | 29              | 32.5                         | 1.433                              | 38.10                |
| 156 | P30825     | High affinity cationic amino acid transporter 1                              | SLC7A1    | 2                     | 2               | 3.8                          | 1.433                              | 34.35                |
| 157 | P51151     | Ras-related protein Rab-9A                                                   | RAB9A     | 2                     | 2               | 12.4                         | 1.428                              | 36.16                |
| 158 | Q14573     | Inositol 1,4,5-trisphosphate receptor type 3                                 | ITPR3     | 1                     | 5               | 2.1                          | 1.427                              | 32.96                |
| 159 | P33897     | ATP-binding cassette sub-family D member 1                                   | ABCD1     | 2                     | 2               | 11.7                         | 1.421                              | 21.23                |
| 160 | Q02338     | D-beta-hydroxybutyrate dehydrogenase, mitochondrial                          | BDH1      | 4                     | 2               | 14.1                         | 1.419                              | 42.89                |
| 161 | P40429     | 60S ribosomal protein L13a                                                   | RPL13A    | 4                     | 7               | 29.6                         | 1.413                              | 29.92                |
| 162 | Q12789     | General transcription factor 3C polypeptide 1                                | GTF3C1    | 4                     | 5               | 3.0                          | 1.406                              | 49.33                |
| 163 | P27695     | DNA-(apurinic or apyrimidinic site) lyase                                    | APEX1     | 9                     | 9               | 43.8                         | 1.404                              | 15.57                |
| 164 | P45974     | Ubiquitin carboxyl-terminal hydrolase 5                                      | USP5      | 6                     | 13              | 23.6                         | 1.404                              | 39.11                |
| 165 | Q9Y2Q9     | 28S ribosomal protein S28, mitochondrial                                     | MRPS28    | 3                     | 2               | 12.3                         | 1.403                              | 4.73                 |
| 166 | Q9Y6C9     | Mitochondrial carrier homolog 2                                              | MTCH2     | 2                     | 4               | 17.5                         | 1.402                              | 19.50                |
| 167 | P82650     | 28S ribosomal protein S22, mitochondrial                                     | MRPS22    | 7                     | 3               | 14.1                         | 1.400                              | 43.63                |
| 168 | Q9NX40     | OCIA domain-containing protein 1                                             | OCIAD1    | 3                     | 2               | 10.1                         | 1.400                              | 13.77                |
| 169 | Q13423     | NAD(P) transhydrogenase, mitochondrial                                       | NNT       | 6                     | 19              | 22.7                         | 1.398                              | 35.88                |
| 170 | Q9H7Z7     | Prostaglandin E synthase 2                                                   | PTGES2    | 3                     | 9               | 34.5                         | 1.396                              | 25.91                |
| 171 | O60664     | Perilipin-3                                                                  | PLIN3     | 7                     | 9               | 30.6                         | 1.385                              | 18.59                |
| 172 | Q92552     | 28S ribosomal protein S27, mitochondrial                                     | MRPS27    | 4                     | 3               | 14.4                         | 1.378                              | 12.87                |
| 173 | Q9BUF5     | Tubulin beta-6 chain                                                         | TUBB6     | 10                    | 13              | 33.9                         | 1.371                              | 37.02                |
| 174 | Q99714     | 3-hydroxyacyl-CoA dehydrogenase type-2                                       | HSD17B10  | 3                     | 7               | 44.8                         | 1.366                              | 14.95                |
| 175 | P61086     | Ubiquitin-conjugating enzyme E2 K                                            | UBE2K     | 6                     | 4               | 28.1                         | 1.361                              | 59.38                |
| 176 | O96008     | Mitochondrial import receptor subunit TOM40 homolog                          | TOMM40    | 4                     | 7               | 32.4                         | 1.359                              | 14.23                |
| 177 | Q07020     | 60S ribosomal protein L18                                                    | RPL18     | 8                     | 8               | 37.2                         | 1.359                              | 15.38                |
| 178 | P36776     | Lon protease homolog, mitochondrial                                          | LONP1     | 9                     | 15              | 22.6                         | 1.357                              | 30.02                |

Supplementary Table 1: Continued.

| No. | Protein ID | Protein name                                                       | Gene name | No. of proteins<br>a) | Seq. Pep.<br>b) | Seq. Cov.<br>% <sup>c)</sup> | ErbB2-digi<br>/ErbB2 <sup>d)</sup> | Var. % <sup>e)</sup> |
|-----|------------|--------------------------------------------------------------------|-----------|-----------------------|-----------------|------------------------------|------------------------------------|----------------------|
| 179 | Q70UQ0     | Inhibitor of nuclear factor kappa-B kinase-interacting protein     | IKBIP     | 1                     | 4               | 11.7                         | 1.349                              | 1.52                 |
| 180 | Q6NUQ4     | Transmembrane protein 214                                          | TMEM214   | 6                     | 5               | 8.2                          | 1.349                              | 14.48                |
| 181 | Q9Y277     | Voltage-dependent anion-selective channel protein 3                | VDAC3     | 7                     | 5               | 24.0                         | 1.347                              | 38.92                |
| 182 | Q9BZZ5     | Apoptosis inhibitor 5                                              | API5      | 9                     | 9               | 24.7                         | 1.346                              | 11.84                |
| 183 | P62906     | 60S ribosomal protein L10a                                         | RPL10A    | 1                     | 8               | 27.6                         | 1.342                              | 13.71                |
| 184 | O75165     | DnaJ homolog subfamily C member 13                                 | DNAJC13   | 2                     | 8               | 4.5                          | 1.342                              | 13.71                |
| 185 | Q02978     | Mitochondrial 2-oxoglutarate/malate carrier protein                | SLC25A11  | 3                     | 7               | 33.8                         | 1.340                              | 30.65                |
| 186 | Q969V3     | Nicalin                                                            | NCLN      | 6                     | 6               | 12.8                         | 1.339                              | 20.92                |
| 187 | O15269     | Serine palmitoyltransferase 1                                      | SPTLC1    | 2                     | 9               | 25.6                         | 1.339                              | 38.94                |
| 188 | Q86U42     | Polyadenylate-binding protein 2                                    | PABPN1    | 6                     | 5               | 31.1                         | 1.338                              | 27.83                |
| 189 | P13674     | Prolyl 4-hydroxylase subunit alpha-1                               | P4HA1     | 3                     | 7               | 15.7                         | 1.336                              | 28.82                |
| 190 | P63244     | Guanine nucleotide-binding protein subunit beta-2-like 1           | GNB2L1    | 22                    | 11              | 30.3                         | 1.334                              | 15.45                |
| 191 | P19338     | Nucleolin                                                          | NCL       | 6                     | 31              | 35.9                         | 1.333                              | 37.75                |
| 192 | Q12965     | Unconventional myosin-1e                                           | MYO1E     | 2                     | 6               | 6.2                          | 1.332                              | 57.34                |
| 193 | Q9H6F5     | Coiled-coil domain-containing protein 86                           | CCDC86    | 2                     | 3               | 6.7                          | 1.330                              | 52.38                |
| 194 | Q8N183     | Mimitin, mitochondrial                                             | NDUFAF2   | 1                     | 3               | 28.4                         | 1.330                              | 5.40                 |
| 195 | P62987     | Ubiquitin                                                          | UBB       | 26                    | 5               | 50.5                         | 1.330                              | 26.53                |
| 196 | Q16718     | NADH dehydrogenase [ubiquinone] 1 alpha subcomplex subunit 5       | NDUFA5    | 5                     | 3               | 40.2                         | 1.329                              | 10.81                |
| 197 | Q9Y3E5     | Peptidyl-tRNA hydrolase 2, mitochondrial                           | PTRH2     | 2                     | 5               | 43.0                         | 1.329                              | 23.15                |
| 198 | Q6I9Y2     | THO complex subunit 7 homolog                                      | THOC7     | 1                     | 3               | 14.7                         | 1.328                              | 4.96                 |
| 199 | P25398     | 40S ribosomal protein S12                                          | RPS12     | 1                     | 3               | 30.3                         | 1.328                              | 7.33                 |
| 200 | P18077     | 60S ribosomal protein L35a                                         | RPL35A    | 4                     | 8               | 40.9                         | 1.327                              | 6.34                 |
| 201 | P62269     | 40S ribosomal protein S18                                          | RPS18     | 2                     | 15              | 63.2                         | 1.326                              | 16.74                |
| 202 | O43143     | Putative pre-mRNA-splicing factor ATP-dependent RNA helicase DHX15 | DHX15     | 1                     | 14              | 19.2                         | 1.316                              | 29.07                |
| 203 | Q9NR28     | Diablo homolog, mitochondrial                                      | DIABLO    | 5                     | 2               | 15.8                         | 1.308                              | 45.09                |
| 204 | Q9UL46     | Proteasome activator complex subunit 2                             | PSME2     | 3                     | 9               | 41.4                         | 1.308                              | 9.44                 |
| 205 | P37268     | Squalene synthase                                                  | FDFT1     | 7                     | 4               | 13.1                         | 1.308                              | 5.85                 |

Supplementary Table 1: Continued.

| No. | Protein ID | Protein name                                                | Gene name | No. of proteins<br>a) | Seq. Pep.<br>b) | Seq. Cov.<br>% <sup>c)</sup> | ErbB2-digi<br>/ErbB2 <sup>d)</sup> | Var. % <sup>e)</sup> |
|-----|------------|-------------------------------------------------------------|-----------|-----------------------|-----------------|------------------------------|------------------------------------|----------------------|
| 206 | P40763     | Signal transducer and activator of transcription 3          | STAT3     | 4                     | 5               | 10.4                         | 1.301                              | 9.45                 |
| 207 | Q9BW60     | Elongation of very long chain fatty acids protein 1         | ELOVL1    | 2                     | 2               | 9.9                          | 1.300                              | 17.37                |
| 208 | Q9Y6M9     | NADH dehydrogenase [ubiquinone] 1 beta subcomplex subunit 9 | NDUFB9    | 4                     | 3               | 25.0                         | 1.297                              | 35.92                |
| 209 | Q9BSJ8     | Extended synaptotagmin-1                                    | ESYT1     | 3                     | 21              | 25.5                         | 1.296                              | 34.07                |
| 210 | P30837     | Aldehyde dehydrogenase X, mitochondrial                     | ALDH1B1   | 1                     | 2               | 5.4                          | 1.293                              | 8.45                 |
| 211 | P02786     | Transferrin receptor protein 1                              | TFRC      | 8                     | 26              | 39.6                         | 1.293                              | 28.10                |
| 212 | P26373     | 60S ribosomal protein L13                                   | RPL13     | 5                     | 10              | 45.5                         | 1.292                              | 27.18                |
| 213 | Q8TCS8     | Polyribonucleotide nucleotidyltransferase 1, mitochondrial  | PNPT1     | 2                     | 7               | 11.5                         | 1.292                              | 15.16                |
| 214 | P46778     | 60S ribosomal protein L21                                   | RPL21     | 3                     | 9               | 42.5                         | 1.290                              | 29.05                |
| 215 | Q9UBV2     | Protein sel-1 homolog 1                                     | SEL1L     | 3                     | 3               | 5.8                          | 1.287                              | 15.56                |
| 216 | O94905     | Erlin-2                                                     | ERLIN2    | 6                     | 8               | 26.3                         | 1.284                              | 13.76                |
| 217 | Q9BUN8     | Derlin-1                                                    | DERL1     | 4                     | 3               | 17.9                         | 1.284                              | 8.98                 |
| 218 | P17252     | Protein kinase C alpha type                                 | PRKCA     | 4                     | 2               | 5.7                          | 1.279                              | 53.17                |
| 219 | P32969     | 60S ribosomal protein L9                                    | RPL9      | 5                     | 7               | 55.2                         | 1.275                              | 57.20                |
| 220 | P49588     | Alanine--tRNA ligase, cytoplasmic                           | AARS      | 2                     | 29              | 38.6                         | 1.272                              | 25.75                |
| 221 | Q14997     | Proteasome activator complex subunit 4                      | PSME4     | 5                     | 18              | 12.0                         | 1.268                              | 53.74                |
| 222 | Q12849     | G-rich sequence factor 1                                    | GRSF1     | 6                     | 2               | 10.4                         | 1.263                              | 14.20                |
| 223 | Q7Z2K6     | Endoplasmic reticulum metalloproteinase 1                   | ERMP1     | 3                     | 5               | 5.9                          | 1.262                              | 15.76                |
| 224 | P43307     | Translocon-associated protein subunit alpha                 | SSR1      | 7                     | 3               | 12.8                         | 1.259                              | 5.66                 |
| 225 | P67812     | Signal peptidase complex catalytic subunit SEC11A           | SEC11A    | 9                     | 5               | 30.1                         | 1.257                              | 42.12                |
| 226 | Q7Z6Z7     | E3 ubiquitin-protein ligase HUWE1                           | HUWE1     | 6                     | 10              | 3.4                          | 1.255                              | 19.60                |
| 227 | Q13085     | Acetyl-CoA carboxylase 1                                    | ACACA     | 19                    | 33              | 16.0                         | 1.255                              | 61.44                |
| 228 | P10809     | 60 kDa heat shock protein, mitochondrial                    | HSPD1     | 8                     | 45              | 72.1                         | 1.252                              | 39.67                |
| 229 | P51659     | Peroxisomal multifunctional enzyme type 2                   | HSD17B4   | 8                     | 14              | 25.1                         | 1.251                              | 49.79                |
| 230 | P00367     | Glutamate dehydrogenase 1, mitochondrial                    | GLUD1     | 4                     | 5               | 13.9                         | 1.247                              | 10.97                |
| 231 | O75340     | Programmed cell death protein 6                             | PDCD6     | 5                     | 7               | 49.2                         | 1.246                              | 13.79                |
| 232 | Q14566     | DNA replication licensing factor MCM6                       | MCM6      | 1                     | 22              | 29.5                         | 1.246                              | 36.76                |
| 233 | P27635     | 60S ribosomal protein L10                                   | RPL10     | 9                     | 7               | 33.1                         | 1.244                              | 19.34                |
| 234 | P23396     | 40S ribosomal protein S3                                    | RPS3      | 14                    | 21              | 72.0                         | 1.242                              | 65.98                |



Supplementary Table 1: Continued.

| No. | Protein ID | Protein name                                                  | Gene name | No. of proteins<br>a) | Seq. Pep.<br>b) | Seq. Cov.<br>% <sup>c)</sup> | ErbB2-digi<br>/ErbB2 <sup>d)</sup> | Var. % <sup>e)</sup> |
|-----|------------|---------------------------------------------------------------|-----------|-----------------------|-----------------|------------------------------|------------------------------------|----------------------|
| 235 | Q9BYD6     | 39S ribosomal protein L1, mitochondrial                       | MRPL1     | 3                     | 3               | 13.2                         | 1.241                              | 38.71                |
| 236 | P39019     | 40S ribosomal protein S19                                     | RPS19     | 5                     | 15              | 66.2                         | 1.241                              | 28.10                |
| 237 | P35270     | Sepiapterin reductase                                         | SPR       | 1                     | 5               | 29.5                         | 1.241                              | 7.21                 |
| 238 | O15260     | Surfeit locus protein 4                                       | SURF4     | 4                     | 2               | 17.6                         | 1.239                              | 31.24                |
| 239 | O95573     | Long-chain-fatty-acid--CoA ligase 3                           | ACSL3     | 8                     | 20              | 33.5                         | 1.238                              | 32.32                |
| 240 | P11387     | DNA topoisomerase 1                                           | TOP1      | 7                     | 23              | 29.2                         | 1.238                              | 34.67                |
| 241 | Q9HAV7     | GrpE protein homolog 1, mitochondrial                         | GRPEL1    | 1                     | 4               | 21.7                         | 1.236                              | 11.80                |
| 242 | Q16630     | Cleavage and polyadenylation specificity factor subunit 6     | CPSF6     | 5                     | 6               | 18.0                         | 1.236                              | 39.70                |
| 243 | Q9Y3A5     | Ribosome maturation protein SBDS                              | SBDS      | 2                     | 6               | 25.2                         | 1.235                              | 28.51                |
| 244 | O14646     | Chromodomain-helicase-DNA-binding protein 1                   | CHD1      | 11                    | 3               | 2.8                          | 1.235                              | 51.06                |
| 245 | Q6PIU2     | Neutral cholesterol ester hydrolase 1                         | NCEH1     | 5                     | 5               | 20.3                         | 1.235                              | 12.94                |
| 246 | Q9HCU4     | Cadherin EGF LAG seven-pass G-type receptor 2                 | CELSR2    | 1                     | 3               | 1.3                          | 1.234                              | 0.98                 |
| 247 | P62913     | 60S ribosomal protein L11                                     | RPL11     | 3                     | 9               | 38.2                         | 1.233                              | 16.36                |
| 248 | P29401     | Transketolase                                                 | TKT       | 6                     | 29              | 49.4                         | 1.233                              | 16.61                |
| 249 | O75643     | U5 small nuclear ribonucleoprotein 200 kDa helicase           | SNRNP200  | 4                     | 48              | 25.9                         | 1.233                              | 38.34                |
| 250 | P62917     | 60S ribosomal protein L8                                      | RPL8      | 5                     | 8               | 25.7                         | 1.231                              | 19.66                |
| 251 | P39023     | 60S ribosomal protein L3                                      | RPL3      | 7                     | 9               | 26.6                         | 1.230                              | 9.85                 |
| 252 | Q9Y4I1     | Unconventional myosin-Va                                      | MYO5A     | 10                    | 14              | 9.0                          | 1.226                              | 24.06                |
| 253 | P08865     | 40S ribosomal protein SA                                      | RPSA      | 4                     | 12              | 56.7                         | 1.224                              | 17.40                |
| 254 | Q93050     | V-type proton ATPase 116 kDa subunit a isoform 1              | ATP6V0A1  | 12                    | 3               | 3.9                          | 1.224                              | 28.29                |
| 255 | Q15070     | Mitochondrial inner membrane protein OXA1L                    | OXA1L     | 5                     | 2               | 8.4                          | 1.222                              | 50.13                |
| 256 | P49207     | 60S ribosomal protein L34                                     | RPL34     | 1                     | 5               | 22.2                         | 1.220                              | 3.62                 |
| 257 | Q96QK1     | Vacuolar protein sorting-associated protein 35                | VPS35     | 3                     | 11              | 18.8                         | 1.219                              | 55.13                |
| 258 | Q3ZCQ8     | Mitochondrial import inner membrane translocase subunit TIM50 | TIMM50    | 12                    | 8               | 28.9                         | 1.218                              | 22.85                |
| 259 | Q5JTV8     | Torsin-1A-interacting protein 1                               | TOR1AIP1  | 6                     | 4               | 8.9                          | 1.214                              | 73.46                |
| 260 | P57088     | Transmembrane protein 33                                      | TMEM33    | 3                     | 3               | 14.0                         | 1.213                              | 4.30                 |
| 261 | P31689     | DnaJ homolog subfamily A member 1                             | DNAJA1    | 3                     | 7               | 31.0                         | 1.213                              | 30.85                |
| 262 | P50914     | 60S ribosomal protein L14                                     | RPL14     | 2                     | 4               | 17.7                         | 1.213                              | 17.50                |
| 263 | P43897     | Elongation factor Ts, mitochondrial                           | TSFM      | 8                     | 4               | 28.8                         | 1.212                              | 30.62                |

Supplementary Table 1: Continued.

| No. | Protein ID | Protein name                                                                                                     | Gene name | No. of proteins<br>a) | Seq. Pep.<br>b) | Seq. Cov.<br>% <sup>c)</sup> | ErbB2-digi<br>/ErbB2 <sup>d)</sup> | Var. % <sup>e)</sup> |
|-----|------------|------------------------------------------------------------------------------------------------------------------|-----------|-----------------------|-----------------|------------------------------|------------------------------------|----------------------|
| 264 | P38646     | Stress-70 protein, mitochondrial                                                                                 | HSPA9     | 5                     | 29              | 47.7                         | 1.212                              | 25.46                |
| 265 | Q13724     | Mannosyl-oligosaccharide glucosidase                                                                             | MOGS      | 5                     | 20              | 33.9                         | 1.210                              | 31.15                |
| 266 | P62888     | 60S ribosomal protein L30                                                                                        | RPL30     | 3                     | 4               | 18.4                         | 1.210                              | 4.82                 |
| 267 | Q7Z4W1     | L-xylulose reductase                                                                                             | DCXR      | 7                     | 2               | 10.3                         | 1.206                              | 11.24                |
| 268 | P18124     | 60S ribosomal protein L7                                                                                         | RPL7      | 4                     | 15              | 45.2                         | 1.201                              | 26.05                |
| 269 | P36957     | Dihydrolipoyllysine-residue succinyltransferase component of 2-oxoglutarate dehydrogenase complex, mitochondrial | DLST      | 6                     | 6               | 14.6                         | 1.201                              | 5.87                 |
| 270 | O00410     | Importin-5                                                                                                       | IPO5      | 19                    | 8               | 9.6                          | 1.198                              | 35.96                |
| 271 | Q96N66     | Lysophospholipid acyltransferase 7                                                                               | MBOAT7    | 3                     | 2               | 6.0                          | 1.198                              | 20.83                |
| 272 | P35249     | Replication factor C subunit 4                                                                                   | RFC4      | 8                     | 6               | 20.1                         | 1.198                              | 28.26                |
| 273 | Q00839     | Heterogeneous nuclear ribonucleoprotein U                                                                        | HNRNPU    | 3                     | 33              | 32.4                         | 1.196                              | 55.40                |
| 274 | Q9UJZ1     | Stomatin-like protein 2, mitochondrial                                                                           | STOML2    | 3                     | 10              | 41.6                         | 1.195                              | 21.67                |
| 275 | Q9NYU2     | UDP-glucose:glycoprotein glucosyltransferase 1                                                                   | UGGT1     | 5                     | 21              | 16.3                         | 1.195                              | 61.23                |
| 276 | O60216     | Double-strand-break repair protein rad21 homolog                                                                 | RAD21     | 1                     | 2               | 3.6                          | 1.192                              | 65.49                |
| 277 | Q8NI27     | THO complex subunit 2                                                                                            | THOC2     | 4                     | 9               | 6.8                          | 1.192                              | 69.42                |
| 278 | Q9Y282     | Endoplasmic reticulum-Golgi intermediate compartment protein 3                                                   | ERGIC3    | 8                     | 3               | 32.3                         | 1.190                              | 40.78                |
| 279 | Q7L014     | Probable ATP-dependent RNA helicase DDX46                                                                        | DDX46     | 2                     | 6               | 6.2                          | 1.190                              | 6.26                 |
| 280 | Q92620     | Pre-mRNA-splicing factor ATP-dependent RNA helicase PRP16                                                        | DHX38     | 6                     | 6               | 6.1                          | 1.189                              | 39.53                |
| 281 | Q5JPE7     | Nodal modulator 2                                                                                                | NOMO2     | 6                     | 17              | 18.1                         | 1.188                              | 24.54                |
| 282 | Q00341     | Vigilin                                                                                                          | HDLBP     | 22                    | 36              | 32.3                         | 1.187                              | 39.93                |
| 283 | Q14435     | Polypeptide N-acetylgalactosaminyltransferase 3                                                                  | GALNT3    | 5                     | 5               | 6.8                          | 1.186                              | 5.92                 |
| 284 | P46779     | 60S ribosomal protein L28                                                                                        | RPL28     | 8                     | 9               | 46.7                         | 1.184                              | 22.86                |
| 285 | Q6P2Q9     | Pre-mRNA-processing-splicing factor 8                                                                            | PRPF8     | 4                     | 53              | 25.5                         | 1.183                              | 34.20                |
| 286 | P42224     | Signal transducer and activator of transcription 1-alpha/beta                                                    | STAT1     | 6                     | 8               | 14.5                         | 1.183                              | 7.62                 |
| 287 | Q96A33     | Coiled-coil domain-containing protein 47                                                                         | CCDC47    | 3                     | 20              | 42.0                         | 1.181                              | 21.51                |
| 288 | Q9P035     | Very-long-chain (3R)-3-hydroxyacyl-[acyl-carrier protein] dehydratase 3                                          | PTPLAD1   | 6                     | 3               | 7.1                          | 1.180                              | 20.90                |

Supplementary Table 1: Continued.

| No. | Protein ID | Protein name                                                             | Gene name | No. of proteins<br>a) | Seq. Pep.<br>b) | Seq. Cov.<br>% <sup>c)</sup> | ErbB2-digi<br>/ErbB2 <sup>d)</sup> | Var. % <sup>e)</sup> |
|-----|------------|--------------------------------------------------------------------------|-----------|-----------------------|-----------------|------------------------------|------------------------------------|----------------------|
| 289 | P61081     | NEDD8-conjugating enzyme Ubc12                                           | UBE2M     | 2                     | 4               | 20.8                         | 1.177                              | 5.59                 |
| 290 | Q9UGP8     | Translocation protein SEC63 homolog                                      | SEC63     | 2                     | 10              | 18.4                         | 1.177                              | 23.57                |
| 291 | Q9NQC3     | Reticulon-4                                                              | RTN4      | 9                     | 7               | 38.1                         | 1.173                              | 88.40                |
| 292 | Q8NFAQ     | Torsin-1A-interacting protein 2                                          | TOR1AIP2  | 1                     | 5               | 14.7                         | 1.172                              | 16.61                |
| 293 | P35250     | Replication factor C subunit 2                                           | RFC2      | 9                     | 3               | 12.2                         | 1.170                              | 4.37                 |
| 294 | P16615     | Sarcoplasmic/endoplasmic reticulum calcium ATPase 2                      | ATP2A2    | 10                    | 18              | 23.6                         | 1.167                              | 28.00                |
| 295 | Q13263     | Transcription intermediary factor 1-beta                                 | TRIM28    | 5                     | 26              | 43.7                         | 1.166                              | 43.54                |
| 296 | P62241     | 40S ribosomal protein S8                                                 | RPS8      | 2                     | 9               | 43.6                         | 1.161                              | 12.99                |
| 297 | P62249     | 40S ribosomal protein S16                                                | RPS16     | 6                     | 11              | 57.5                         | 1.160                              | 30.85                |
| 298 | P04843     | Dolichyl-diphosphooligosaccharide--protein glycosyltransferase subunit 1 | RPN1      | 3                     | 27              | 49.3                         | 1.160                              | 21.06                |
| 299 | Q9NTZ6     | RNA-binding protein 12                                                   | RBM12     | 4                     | 4               | 5.5                          | 1.158                              | 0.43                 |
| 300 | Q92667     | A-kinase anchor protein 1, mitochondrial                                 | AKAP1     | 4                     | 4               | 30.9                         | 1.156                              | 19.54                |
| 301 | P82663     | 28S ribosomal protein S25, mitochondrial                                 | MRPS25    | 4                     | 2               | 12.7                         | 1.155                              | 19.73                |
| 302 | P30519     | Heme oxygenase 2                                                         | HMOX2     | 9                     | 13              | 53.8                         | 1.155                              | 14.23                |
| 303 | Q8IXB1     | DnaJ homolog subfamily C member 10                                       | DNAJC10   | 2                     | 3               | 4.0                          | 1.155                              | 2.33                 |
| 304 | P51571     | Translocon-associated protein subunit delta                              | SSR4      | 2                     | 5               | 31.2                         | 1.154                              | 16.84                |
| 305 | P50416     | Carnitine O-palmitoyltransferase 1, liver isoform                        | CPT1A     | 6                     | 16              | 24.3                         | 1.153                              | 37.08                |
| 306 | P07355     | Annexin A2                                                               | ANXA2     | 25                    | 33              | 64.6                         | 1.152                              | 34.26                |
| 307 | P06493     | Cyclin-dependent kinase 1                                                | CDK1      | 37                    | 7               | 24.6                         | 1.151                              | 93.14                |
| 308 | P61353     | 60S ribosomal protein L27                                                | RPL27     | 4                     | 10              | 54.4                         | 1.151                              | 36.98                |
| 309 | O43809     | Cleavage and polyadenylation specificity factor subunit 5                | NUDT21    | 3                     | 9               | 41.9                         | 1.151                              | 31.55                |
| 310 | P38919     | Eukaryotic initiation factor 4A-III                                      | EIF4A3    | 2                     | 21              | 46.5                         | 1.150                              | 27.59                |
| 311 | P33991     | DNA replication licensing factor MCM4                                    | MCM4      | 7                     | 19              | 29.1                         | 1.148                              | 13.55                |
| 312 | P30050     | 60S ribosomal protein L12                                                | RPL12     | 2                     | 5               | 40.6                         | 1.148                              | 35.61                |
| 313 | P36578     | 60S ribosomal protein L4                                                 | RPL4      | 4                     | 17              | 36.1                         | 1.145                              | 32.01                |
| 314 | P51572     | B-cell receptor-associated protein 31                                    | BCAP31    | 7                     | 20              | 52.8                         | 1.144                              | 28.43                |
| 315 | P05387     | 60S acidic ribosomal protein P2                                          | RPLP2     | 3                     | 11              | 97.4                         | 1.144                              | 29.63                |
| 316 | P00533     | Epidermal growth factor receptor                                         | EGFR      | 7                     | 7               | 8.2                          | 1.143                              | 29.31                |
| 317 | Q9NZM1     | Myoferlin                                                                | MYOF      | 28                    | 63              | 34.0                         | 1.140                              | 49.75                |

Supplementary Table 1: Continued.

| No. | Protein ID | Protein name                                                                  | Gene name | No. of proteins<br>a) | Seq.<br>Pep. b) | Seq. Cov.<br>% c) | ErbB2-digi<br>/ErbB2 d) | Var. % e) |
|-----|------------|-------------------------------------------------------------------------------|-----------|-----------------------|-----------------|-------------------|-------------------------|-----------|
| 318 | Q00610     | Clathrin heavy chain 1                                                        | CLTC      | 11                    | 61              | 42.1              | 1.139                   | 36.73     |
| 319 | Q9H307     | Pinin                                                                         | PNN       | 2                     | 7               | 11.9              | 1.139                   | 24.84     |
| 320 | P60468     | Protein transport protein Sec61 subunit beta                                  | SEC61B    | 2                     | 3               | 37.5              | 1.137                   | 9.85      |
| 321 | Q9BVK6     | Transmembrane emp24 domain-containing protein 9                               | TMED9     | 1                     | 9               | 27.7              | 1.136                   | 32.01     |
| 322 | P06733     | Alpha-enolase                                                                 | ENO1      | 15                    | 25              | 53.7              | 1.134                   | 60.52     |
| 323 | P52815     | Mitochondrial dicarboxylate carrier                                           | SLC25A10  | 4                     | 7               | 24.4              | 1.133                   | 21.69     |
| 324 | Q13247     | Serine/arginine-rich splicing factor 6                                        | SRSF6     | 4                     | 9               | 23.3              | 1.133                   | 35.98     |
| 325 | P08648     | Integrin alpha-5                                                              | ITGA5     | 2                     | 6               | 7.9               | 1.133                   | 25.42     |
| 326 | Q02878     | 60S ribosomal protein L6                                                      | RPL6      | 7                     | 16              | 45.5              | 1.132                   | 19.73     |
| 327 | Q14554     | Protein disulfide-isomerase A5                                                | PDIA5     | 2                     | 3               | 8.3               | 1.131                   | 21.25     |
| 328 | O60341     | Lysine-specific histone demethylase 1A                                        | KDM1A     | 4                     | 4               | 6.1               | 1.131                   | 25.20     |
| 329 | Q8NF37     | Lysophosphatidylcholine acyltransferase 1                                     | LPCAT1    | 1                     | 6               | 12.4              | 1.130                   | 24.39     |
| 330 | O95861     | 3(2),5-bisphosphate nucleotidase 1                                            | BPNT1     | 9                     | 4               | 18.8              | 1.129                   | 15.98     |
| 331 | Q9UMS4     | Pre-mRNA-processing factor 19                                                 | PRPF19    | 5                     | 8               | 20.0              | 1.129                   | 47.16     |
| 332 | Q9UHG3     | Prenylcysteine oxidase 1                                                      | PCYOX1    | 7                     | 7               | 17.4              | 1.128                   | 23.34     |
| 333 | P62851     | 40S ribosomal protein S25                                                     | RPS25     | 1                     | 6               | 31.2              | 1.127                   | 12.03     |
| 334 | Q9Y3D6     | Mitochondrial fission 1 protein                                               | FIS1      | 1                     | 3               | 26.3              | 1.127                   | 0.18      |
| 335 | Q15029     | 116 kDa U5 small nuclear ribonucleoprotein component                          | EFTUD2    | 5                     | 23              | 30.6              | 1.127                   | 37.28     |
| 336 | Q13510     | Acid ceramidase                                                               | ASAH1     | 5                     | 2               | 7.5               | 1.122                   | 15.69     |
| 337 | P11717     | Cation-independent mannose-6-phosphate receptor                               | IGF2R     | 2                     | 7               | 2.9               | 1.121                   | 10.18     |
| 338 | P51532     | Transcription activator BRG1                                                  | SMARCA4   | 16                    | 20              | 16.1              | 1.120                   | 28.30     |
| 339 | Q13618     | Cullin-3                                                                      | CUL3      | 5                     | 3               | 5.4               | 1.120                   | 34.73     |
| 340 | P39656     | Dolichyl-diphosphooligosaccharide--protein glycosyltransferase 48 kDa subunit | DDOST     | 3                     | 12              | 42.1              | 1.119                   | 31.29     |
| 341 | Q9BTZ2     | Dehydrogenase/reductase SDR family member 4                                   | DHRS4     | 12                    | 4               | 13.7              | 1.119                   | 11.17     |
| 342 | Q9NX14     | NADH dehydrogenase [ubiquinone] 1 beta subcomplex subunit 11, mitochondrial   | NDUFB11   | 2                     | 2               | 22.2              | 1.119                   | 41.54     |
| 343 | P56545     | C-terminal-binding protein 2                                                  | CTBP2     | 10                    | 5               | 12.8              | 1.116                   | 74.58     |
| 344 | P20645     | Cation-dependent mannose-6-phosphate receptor                                 | M6PR      | 3                     | 2               | 12.6              | 1.115                   | 19.87     |
| 345 | Q9HDC9     | Adipocyte plasma membrane-associated protein                                  | APMAP     | 3                     | 17              | 46.4              | 1.115                   | 49.89     |

Supplementary Table 1: Continued.

| No. | Protein ID | Protein name                                                                 | Gene name | No. of proteins<br>a) | Seq. Pep.<br>b) | Seq. Cov.<br>% <sup>c)</sup> | ErbB2-digi<br>/ErbB2 <sup>d)</sup> | Var. % <sup>e)</sup> |
|-----|------------|------------------------------------------------------------------------------|-----------|-----------------------|-----------------|------------------------------|------------------------------------|----------------------|
| 346 | Q02543     | 60S ribosomal protein L18a                                                   | RPL18A    | 5                     | 7               | 31.9                         | 1.115                              | 39.57                |
| 347 | P09497     | Clathrin light chain B                                                       | CLTB      | 3                     | 4               | 16.6                         | 1.114                              | 5.78                 |
| 348 | Q9BTV4     | Transmembrane protein 43                                                     | TMEM43    | 2                     | 11              | 36.0                         | 1.113                              | 10.57                |
| 349 | Q96CW1     | AP-2 complex subunit mu                                                      | AP2M1     | 8                     | 5               | 13.2                         | 1.113                              | 43.41                |
| 350 | O96019     | Actin-like protein 6A                                                        | ACTL6A    | 4                     | 4               | 16.5                         | 1.112                              | 17.55                |
| 351 | O95602     | DNA-directed RNA polymerase I subunit RPA1                                   | POLR1A    | 2                     | 3               | 2.2                          | 1.111                              | 16.26                |
| 352 | P30876     | DNA-directed RNA polymerase II subunit RPB2                                  | POLR2B    | 3                     | 3               | 4.1                          | 1.111                              | 27.36                |
| 353 | O14980     | Exportin-1                                                                   | XPO1      | 10                    | 13              | 14.0                         | 1.110                              | 33.83                |
| 354 | Q9Y3A6     | Transmembrane emp24 domain-containing protein 5                              | TMED5     | 4                     | 2               | 8.3                          | 1.108                              | 5.57                 |
| 355 | Q9BWH2     | FUN14 domain-containing protein 2                                            | FUNDC2    | 1                     | 2               | 5.3                          | 1.107                              | 10.68                |
| 356 | O43760     | Synaptogyrin-2                                                               | SYNGR2    | 6                     | 4               | 17.0                         | 1.107                              | 46.48                |
| 357 | O43172     | U4/U6 small nuclear ribonucleoprotein Prp4                                   | PRPF4     | 2                     | 6               | 16.1                         | 1.106                              | 15.57                |
| 358 | Q8N201     | Integrator complex subunit 1                                                 | INTS1     | 2                     | 2               | 1.4                          | 1.106                              | 5.93                 |
| 359 | Q15428     | Splicing factor 3A subunit 2                                                 | SF3A2     | 2                     | 5               | 13.6                         | 1.104                              | 31.68                |
| 360 | O95232     | Luc7-like protein 3                                                          | LUC7L3    | 9                     | 3               | 23.4                         | 1.104                              | 2.23                 |
| 361 | Q9Y230     | RuvB-like 2                                                                  | RUVBL2    | 6                     | 15              | 34.8                         | 1.103                              | 40.06                |
| 362 | P18206     | Vinculin                                                                     | VCL       | 5                     | 24              | 29.6                         | 1.101                              | 74.72                |
| 363 | Q8N138     | ORM1-like protein 3                                                          | ORMDL3    | 4                     | 3               | 24.1                         | 1.100                              | 23.39                |
| 364 | P37108     | Signal recognition particle 14 kDa protein                                   | SRP14     | 2                     | 9               | 44.9                         | 1.099                              | 27.26                |
| 365 | O14735     | CDP-diacylglycerol--inositol 3-phosphatidyltransferase                       | CDIPT     | 4                     | 2               | 12.5                         | 1.099                              | 12.65                |
| 366 | Q8NC51     | Plasminogen activator inhibitor 1 RNA-binding protein                        | SERBP1    | 4                     | 12              | 35.9                         | 1.098                              | 32.70                |
| 367 | Q8IWX8     | Calcium homeostasis endoplasmic reticulum protein                            | CHERP     | 2                     | 5               | 7.8                          | 1.098                              | 17.28                |
| 368 | Q9Y394     | Dehydrogenase/reductase SDR family member 7                                  | DHRS7     | 4                     | 4               | 18.0                         | 1.098                              | 18.58                |
| 369 | Q86Y56     | HEAT repeat-containing protein 2                                             | HEATR2    | 5                     | 3               | 5.9                          | 1.098                              | 20.40                |
| 370 | P46977     | Dolichyl-diphosphooligosaccharide--protein glycosyltransferase subunit STT3A | STT3A     | 5                     | 8               | 10.8                         | 1.097                              | 16.97                |
| 371 | Q09028     | Histone-binding protein RBBP4                                                | RBBP4     | 12                    | 8               | 20.7                         | 1.097                              | 11.87                |
| 372 | P33993     | DNA replication licensing factor MCM7                                        | MCM7      | 4                     | 22              | 37.1                         | 1.097                              | 19.81                |
| 373 | Q9NR30     | Nucleolar RNA helicase 2                                                     | DDX21     | 3                     | 13              | 21.7                         | 1.096                              | 29.39                |
| 374 | P22392     | Nucleoside diphosphate kinase B                                              | NME2      | 9                     | 17              | 76.8                         | 1.093                              | 148.67               |
| 375 | P60866     | 40S ribosomal protein S20                                                    | RPS20     | 5                     | 5               | 26.1                         | 1.093                              | 12.14                |

Supplementary Table 1: Continued.

| No. | Protein ID | Protein name                                                                                  | Gene name | No. of proteins<br>a) | Seq. Pep.<br>b) | Seq. Cov.<br>% <sup>c)</sup> | ErbB2-digi<br>/ErbB2 <sup>d)</sup> | Var. % <sup>e)</sup> |
|-----|------------|-----------------------------------------------------------------------------------------------|-----------|-----------------------|-----------------|------------------------------|------------------------------------|----------------------|
| 376 | P25685     | DnaJ homolog subfamily B member 1                                                             | DNAJB1    | 9                     | 8               | 33.5                         | 1.090                              | 17.49                |
| 377 | P11279     | Lysosome-associated membrane glycoprotein 1                                                   | LAMP1     | 2                     | 4               | 10.6                         | 1.090                              | 10.06                |
| 378 | Q8TEM1     | Nuclear pore membrane glycoprotein 210                                                        | NUP210    | 2                     | 16              | 10.7                         | 1.088                              | 28.21                |
| 379 | P00387     | NADH-cytochrome b5 reductase 3                                                                | CYB5R3    | 4                     | 6               | 32.6                         | 1.088                              | 26.54                |
| 380 | Q09666     | Neuroblast differentiation-associated protein AHNAK                                           | AHNAK     | 7                     | 163             | 46.0                         | 1.088                              | 36.15                |
| 381 | Q13769     | THO complex subunit 5 homolog                                                                 | THOC5     | 5                     | 4               | 22.5                         | 1.088                              | 6.22                 |
| 382 | Q8N684     | Cleavage and polyadenylation specificity factor subunit 7                                     | CPSF7     | 7                     | 4               | 16.3                         | 1.088                              | 4.22                 |
| 383 | P08579     | U2 small nuclear ribonucleoprotein B                                                          | SNRPB2    | 1                     | 7               | 35.6                         | 1.087                              | 8.25                 |
| 384 | P16435     | NADPH--cytochrome P450 reductase                                                              | POR       | 8                     | 26              | 43.4                         | 1.086                              | 35.53                |
| 385 | Q14165     | Malectin                                                                                      | MLEC      | 4                     | 6               | 29.5                         | 1.085                              | 11.16                |
| 386 | Q8IWS0     | PHD finger protein 6                                                                          | PHF6      | 6                     | 3               | 13.0                         | 1.084                              | 15.70                |
| 387 | P48449     | Lanosterol synthase                                                                           | LSS       | 4                     | 7               | 13.0                         | 1.084                              | 39.40                |
| 388 | Q9P0I2     | ER membrane protein complex subunit 3                                                         | EMC3      | 3                     | 4               | 29.2                         | 1.083                              | 8.87                 |
| 389 | Q9UM00     | Transmembrane and coiled-coil domain-containing protein 1                                     | TMCO1     | 5                     | 3               | 35.6                         | 1.083                              | 10.57                |
| 390 | O60264     | SWI/SNF-related matrix-associated actin-dependent regulator of chromatin subfamily A member 5 | SMARCA5   | 3                     | 10              | 9.5                          | 1.082                              | 50.16                |
| 391 | P08621     | U1 small nuclear ribonucleoprotein 70 kDa                                                     | SNRNP70   | 6                     | 6               | 15.8                         | 1.081                              | 119.42               |
| 392 | Q15233     | Non-POU domain-containing octamer-binding protein                                             | NONO      | 6                     | 21              | 45.9                         | 1.081                              | 27.97                |
| 393 | Q15155     | Nodal modulator 1                                                                             | NOMO1     | 3                     | 17              | 17.7                         | 1.080                              | 31.97                |
| 394 | P22102     | Trifunctional purine biosynthetic protein adenosine-3                                         | GART      | 9                     | 12              | 13.7                         | 1.078                              | 14.49                |
| 395 | O75955     | Flotillin-1                                                                                   | FLOT1     | 8                     | 9               | 28.2                         | 1.077                              | 31.43                |
| 396 | Q15904     | V-type proton ATPase subunit S1                                                               | ATP6AP1   | 6                     | 4               | 10.9                         | 1.076                              | 3.97                 |
| 397 | Q92896     | Golgi apparatus protein 1                                                                     | GLG1      | 6                     | 7               | 6.5                          | 1.074                              | 21.35                |
| 398 | P24928     | DNA-directed RNA polymerase II subunit RPB1                                                   | POLR2A    | 2                     | 8               | 7.0                          | 1.074                              | 29.76                |
| 399 | P60903     | Protein S100-A10                                                                              | S100A10   | 1                     | 2               | 27.8                         | 1.074                              | 14.90                |
| 400 | Q13509     | Tubulin beta-3 chain                                                                          | TUBB3     | 9                     | 18              | 49.3                         | 1.073                              | 43.45                |
| 401 | Q9NTJ5     | Phosphatidylinositol phosphatase SAC1                                                         | SACM1L    | 6                     | 4               | 6.1                          | 1.070                              | 38.62                |
| 402 | O00391     | Sulfhydryl oxidase 1                                                                          | QSOX1     | 3                     | 2               | 4.8                          | 1.069                              | 4.03                 |
| 403 | Q9Y679     | Ancient ubiquitous protein 1                                                                  | AUP1      | 3                     | 3               | 11.3                         | 1.069                              | 20.07                |

Supplementary Table 1: Continued.

| No. | Protein ID | Protein name                                                                | Gene name | No. of proteins<br>a) | Seq.<br>Pep. b) | Seq. Cov.<br>% c) | ErbB2-digi<br>/ErbB2 d) | Var. % e) |
|-----|------------|-----------------------------------------------------------------------------|-----------|-----------------------|-----------------|-------------------|-------------------------|-----------|
| 404 | P13639     | Elongation factor 2                                                         | EEF2      | 1                     | 40              | 46.4              | 1.069                   | 29.18     |
| 405 | Q96T76     | MMS19 nucleotide excision repair protein homolog                            | MMS19     | 7                     | 2               | 2.3               | 1.069                   | 52.35     |
| 406 | P46777     | 60S ribosomal protein L5                                                    | RPL5      | 3                     | 10              | 28.6              | 1.069                   | 17.83     |
| 407 | Q8TC12     | Retinol dehydrogenase 11                                                    | RDH11     | 8                     | 5               | 21.7              | 1.068                   | 20.33     |
| 408 | Q8WWY3     | U4/U6 small nuclear ribonucleoprotein Prp31                                 | PRPF31    | 8                     | 5               | 14.6              | 1.067                   | 23.88     |
| 409 | Q9BUQ8     | Probable ATP-dependent RNA helicase DDX23                                   | DDX23     | 3                     | 10              | 12.8              | 1.067                   | 25.56     |
| 410 | P62424     | 60S ribosomal protein L7a                                                   | RPL7A     | 3                     | 13              | 33.8              | 1.067                   | 36.60     |
| 411 | Q07065     | Cytoskeleton-associated protein 4                                           | CKAP4     | 1                     | 24              | 48.8              | 1.066                   | 25.65     |
| 412 | P25205     | DNA replication licensing factor MCM3                                       | MCM3      | 4                     | 22              | 36.8              | 1.066                   | 25.78     |
| 413 | P05386     | 60S acidic ribosomal protein P1                                             | RPLP1     | 1                     | 2               | 28.9              | 1.066                   | 5.97      |
| 414 | O75934     | Pre-mRNA-splicing factor SPF27                                              | BCAS2     | 1                     | 4               | 32.9              | 1.063                   | 18.92     |
| 415 | O95373     | Importin-7                                                                  | IPO7      | 2                     | 9               | 10.1              | 1.063                   | 25.30     |
| 416 | P04844     | Dolichyl-diphosphooligosaccharide--protein<br>glycosyltransferase subunit 2 | RPN2      | 7                     | 14              | 31.7              | 1.062                   | 22.42     |
| 417 | Q86UE4     | Protein LYRIC                                                               | MTDH      | 5                     | 13              | 31.1              | 1.060                   | 61.05     |
| 418 | P52209     | 6-phosphogluconate dehydrogenase, decarboxylating                           | PGD       | 7                     | 14              | 34.5              | 1.060                   | 9.62      |
| 419 | Q16698     | 2,4-dienoyl-CoA reductase, mitochondrial                                    | DECR1     | 7                     | 6               | 22.7              | 1.060                   | 16.51     |
| 420 | O60832     | H/ACA ribonucleoprotein complex subunit 4                                   | DKC1      | 5                     | 3               | 7.8               | 1.058                   | 70.50     |
| 421 | Q04837     | Single-stranded DNA-binding protein, mitochondrial                          | SSBP1     | 3                     | 4               | 33.1              | 1.056                   | 11.04     |
| 422 | P17844     | Probable ATP-dependent RNA helicase DDX5                                    | DDX5      | 14                    | 36              | 47.9              | 1.056                   | 29.41     |
| 423 | Q9NSE4     | Isoleucine--tRNA ligase, mitochondrial                                      | IARS2     | 2                     | 5               | 7.2               | 1.055                   | 7.40      |
| 424 | P61978     | Heterogeneous nuclear ribonucleoprotein K                                   | HNRNPK    | 8                     | 22              | 53.6              | 1.055                   | 27.56     |
| 425 | Q53FV1     | ORM1-like protein 2                                                         | ORMDL2    | 3                     | 3               | 21.6              | 1.054                   | 34.10     |
| 426 | Q8TCT9     | Minor histocompatibility antigen H13                                        | HM13      | 4                     | 4               | 15.8              | 1.054                   | 26.33     |
| 427 | P56537     | Eukaryotic translation initiation factor 6                                  | EIF6      | 3                     | 4               | 26.9              | 1.053                   | 3.03      |
| 428 | O75400     | Pre-mRNA-processing factor 40 homolog A                                     | PRPF40A   | 6                     | 11              | 13.3              | 1.053                   | 28.35     |
| 429 | P46459     | Vesicle-fusing ATPase                                                       | NSF       | 6                     | 12              | 21.6              | 1.053                   | 15.86     |
| 430 | Q7Z7H5     | Transmembrane emp24 domain-containing protein 4                             | TMED4     | 3                     | 3               | 14.0              | 1.049                   | 6.49      |
| 431 | P15924     | Desmoplakin                                                                 | DSP       | 3                     | 40              | 16.7              | 1.047                   | 68.03     |
| 432 | P46776     | 60S ribosomal protein L27a                                                  | RPL27A    | 4                     | 4               | 31.5              | 1.047                   | 28.13     |
| 433 | Q8WUM4     | Programmed cell death 6-interacting protein                                 | PDCD6IP   | 6                     | 11              | 16.6              | 1.047                   | 44.84     |

Supplementary Table 1: Continued.

| No. | Protein ID | Protein name                                                         | Gene name | No. of proteins<br>a) | Seq.<br>Pep. b) | Seq. Cov.<br>% c) | ErbB2-digi<br>/ErbB2 d) | Var. % e) |
|-----|------------|----------------------------------------------------------------------|-----------|-----------------------|-----------------|-------------------|-------------------------|-----------|
| 434 | Q6DD88     | Atlastin-3                                                           | ATL3      | 4                     | 9               | 28.1              | 1.046                   | 24.41     |
| 435 | P19784     | Casein kinase II subunit alpha                                       | CSNK2A2   | 4                     | 2               | 6.3               | 1.045                   | 20.64     |
| 436 | P55072     | Transitional endoplasmic reticulum ATPase                            | VCP       | 4                     | 41              | 52.1              | 1.045                   | 37.46     |
| 437 | Q12797     | Aspartyl/asparaginyl beta-hydroxylase                                | ASPH      | 15                    | 20              | 31.9              | 1.044                   | 26.39     |
| 438 | P84090     | Enhancer of rudimentary homolog                                      | ERH       | 2                     | 2               | 25.0              | 1.042                   | 6.07      |
| 439 | Q9NP72     | Ras-related protein Rab-18                                           | RAB18     | 5                     | 7               | 38.3              | 1.041                   | 29.44     |
| 440 | P43487     | Ran-specific GTPase-activating protein                               | RANBP1    | 8                     | 6               | 43.3              | 1.040                   | 62.32     |
| 441 | O43592     | Exportin-T                                                           | XPOT      | 4                     | 8               | 10.2              | 1.039                   | 124.90    |
| 442 | Q12906     | Interleukin enhancer-binding factor 3                                | ILF3      | 20                    | 30              | 50.0              | 1.038                   | 31.45     |
| 443 | A5YKK6     | CCR4-NOT transcription complex subunit 1                             | CNOT1     | 7                     | 4               | 2.0               | 1.038                   | 31.11     |
| 444 | Q16531     | DNA damage-binding protein 1                                         | DDB1      | 16                    | 23              | 24.9              | 1.038                   | 28.09     |
| 445 | Q12905     | Interleukin enhancer-binding factor 2                                | ILF2      | 2                     | 12              | 51.0              | 1.038                   | 39.59     |
| 446 | O75915     | PRA1 family protein 3                                                | ARL6IP5   | 4                     | 3               | 14.4              | 1.038                   | 9.63      |
| 447 | P05388     | 60S acidic ribosomal protein P0                                      | RPLP0     | 14                    | 13              | 42.3              | 1.037                   | 35.15     |
| 448 | Q07021     | Complement component 1 Q subcomponent-binding protein, mitochondrial | C1QBP     | 3                     | 6               | 24.1              | 1.037                   | 30.55     |
| 449 | P68400     | Casein kinase II subunit alpha                                       | CSNK2A1   | 6                     | 12              | 39.7              | 1.036                   | 21.34     |
| 450 | Q9BQE5     | Apolipoprotein L2                                                    | APOL2     | 2                     | 4               | 13.1              | 1.036                   | 52.78     |
| 451 | Q99729     | Heterogeneous nuclear ribonucleoprotein A/B                          | HNRNPAB   | 7                     | 7               | 32.1              | 1.036                   | 29.36     |
| 452 | Q96HY6     | DDRGK domain-containing protein 1                                    | DDRGK1    | 2                     | 3               | 14.7              | 1.034                   | 36.57     |
| 453 | Q13445     | Transmembrane emp24 domain-containing protein 1                      | TMED1     | 3                     | 2               | 22.0              | 1.033                   | 7.57      |
| 454 | Q9Y5M8     | Signal recognition particle receptor subunit beta                    | SRPRB     | 3                     | 8               | 29.5              | 1.033                   | 13.43     |
| 455 | P02545     | Prelamin-A/C                                                         | LMNA      | 8                     | 29              | 46.5              | 1.032                   | 28.38     |
| 456 | O14497     | AT-rich interactive domain-containing protein 1A                     | ARID1A    | 14                    | 16              | 11.5              | 1.031                   | 48.72     |
| 457 | Q01081     | Splicing factor U2AF 35 kDa subunit                                  | U2AF1     | 12                    | 5               | 22.1              | 1.031                   | 66.60     |
| 458 | P14625     | Endoplasmic                                                          | HSP90B1   | 4                     | 51              | 54.0              | 1.030                   | 41.48     |
| 459 | P22307     | Non-specific lipid-transfer protein                                  | SCP2      | 7                     | 5               | 32.1              | 1.029                   | 9.72      |
| 460 | P83731     | 60S ribosomal protein L24                                            | RPL24     | 3                     | 3               | 24.8              | 1.028                   | 11.70     |
| 461 | P61019     | Ras-related protein Rab-2A                                           | RAB2A     | 8                     | 11              | 63.2              | 1.028                   | 15.50     |
| 462 | Q6P1M0     | Long-chain fatty acid transport protein 4                            | SLC27A4   | 2                     | 3               | 5.9               | 1.027                   | 9.69      |
| 463 | O00194     | Ras-related protein Rab-27B                                          | RAB27B    | 2                     | 11              | 46.8              | 1.027                   | 18.83     |



Supplementary Table 1: Continued.

| No. | Protein ID | Protein name                                             | Gene name | No. of proteins<br>a) | Seq. Pep.<br>b) | Seq. Cov. %<br>c) | ErbB2-digi /ErbB2<br>d) | Var. %<br>e) |
|-----|------------|----------------------------------------------------------|-----------|-----------------------|-----------------|-------------------|-------------------------|--------------|
| 464 | P33992     | DNA replication licensing factor MCM5                    | MCM5      | 4                     | 18              | 29.8              | 1.025                   | 26.73        |
| 465 | P54578     | Ubiquitin carboxyl-terminal hydrolase 14                 | USP14     | 6                     | 12              | 35.9              | 1.024                   | 15.37        |
| 466 | Q12996     | Cleavage stimulation factor subunit 3                    | CSTF3     | 2                     | 4               | 9.2               | 1.022                   | 21.26        |
| 467 | Q01105     | Protein SET                                              | SET       | 5                     | 12              | 47.9              | 1.022                   | 15.46        |
| 468 | Q29RF7     | Sister chromatid cohesion protein PDS5 homolog A         | PDS5A     | 4                     | 15              | 15.9              | 1.020                   | 80.13        |
| 469 | Q13838     | Spliceosome RNA helicase DDX39B                          | DDX39B    | 18                    | 15              | 38.1              | 1.019                   | 22.73        |
| 470 | Q9Y5B9     | FACT complex subunit SPT16                               | SUPT16H   | 4                     | 27              | 27.7              | 1.019                   | 46.92        |
| 471 | Q8N766     | ER membrane protein complex subunit 1                    | EMC1      | 5                     | 13              | 19.1              | 1.019                   | 28.29        |
| 472 | P46781     | 40S ribosomal protein S9                                 | RPS9      | 5                     | 16              | 58.8              | 1.019                   | 14.63        |
| 473 | Q13123     | Protein Red                                              | IK        | 5                     | 2               | 9.4               | 1.019                   | 35.00        |
| 474 | P20340     | Ras-related protein Rab-6A                               | RAB6A     | 13                    | 11              | 53.4              | 1.019                   | 16.00        |
| 475 | P10316     | HLA class I histocompatibility antigen, A-69 alpha chain | HLA-A     | 53                    | 6               | 21.9              | 1.019                   | 17.12        |
| 476 | P38606     | V-type proton ATPase catalytic subunit A                 | ATP6V1A   | 4                     | 9               | 20.9              | 1.018                   | 29.15        |
| 477 | Q7Z406     | Myosin-14                                                | MYH14     | 8                     | 46              | 28.7              | 1.018                   | 39.96        |
| 478 | Q96GC9     | Vacuole membrane protein 1                               | VMP1      | 13                    | 3               | 15.1              | 1.018                   | 13.80        |
| 479 | Q13641     | Trophoblast glycoprotein                                 | TPBG      | 1                     | 4               | 12.9              | 1.017                   | 28.93        |
| 480 | O00268     | Transcription initiation factor TFIID subunit 4          | TAF4      | 2                     | 2               | 13.0              | 1.016                   | 24.98        |
| 481 | Q53GS9     | U4/U6.U5 tri-snRNP-associated protein 2                  | USP39     | 5                     | 7               | 19.4              | 1.015                   | 25.49        |
| 482 | O75937     | DnaJ homolog subfamily C member 8                        | DNAJC8    | 2                     | 5               | 33.2              | 1.015                   | 16.22        |
| 483 | P62244     | 40S ribosomal protein S15a                               | RPS15A    | 7                     | 8               | 60.8              | 1.015                   | 25.29        |
| 484 | P62316     | Small nuclear ribonucleoprotein Sm D2                    | SNRPD2    | 4                     | 7               | 44.9              | 1.014                   | 12.74        |
| 485 | P23246     | Splicing factor, proline- and glutamine-rich             | SFPQ      | 4                     | 22              | 39.3              | 1.013                   | 56.63        |
| 486 | P08238     | Heat shock protein HSP 90-beta                           | HSP90AB1  | 4                     | 50              | 54.1              | 1.013                   | 31.02        |
| 487 | Q92922     | SWI/SNF complex subunit SMARCC1                          | SMARCC1   | 2                     | 11              | 13.0              | 1.013                   | 26.20        |
| 488 | Q9H3N1     | Thioredoxin-related transmembrane protein 1              | TMX1      | 2                     | 6               | 18.9              | 1.013                   | 46.74        |
| 489 | O95470     | Sphingosine-1-phosphate lyase 1                          | SGPL1     | 3                     | 6               | 13.6              | 1.013                   | 39.70        |
| 490 | Q9HAV4     | Exportin-5                                               | XPO5      | 3                     | 6               | 6.1               | 1.012                   | 25.62        |
| 491 | Q96P11     | Putative methyltransferase NSUN5                         | NSUN5     | 7                     | 2               | 6.6               | 1.011                   | 68.03        |
| 492 | Q12981     | Vesicle transport protein SEC20                          | BNIP1     | 4                     | 2               | 9.2               | 1.010                   | 14.78        |
| 493 | P67870     | Casein kinase II subunit beta                            | CSNK2B    | 3                     | 3               | 15.8              | 1.008                   | 24.61        |
| 494 | Q96FV9     | THO complex subunit 1                                    | THOC1     | 6                     | 5               | 10.8              | 1.007                   | 8.24         |

Supplementary Table 1: Continued.

| No. | Protein ID | Protein name                                     | Gene name | No. of proteins <sup>a)</sup> | Seq. Pep. <sup>b)</sup> | Seq. Cov. % <sup>c)</sup> | ErbB2-digi /ErbB2 <sup>d)</sup> | Var. % <sup>e)</sup> |
|-----|------------|--------------------------------------------------|-----------|-------------------------------|-------------------------|---------------------------|---------------------------------|----------------------|
| 495 | Q14683     | Structural maintenance of chromosomes protein 1A | SMC1A     | 5                             | 35                      | 30.8                      | 1.006                           | 63.72                |
| 496 | P49736     | DNA replication licensing factor MCM2            | MCM2      | 6                             | 28                      | 41.5                      | 1.006                           | 30.43                |
| 497 | O95197     | Reticulon-3                                      | RTN3      | 5                             | 2                       | 5.5                       | 1.005                           | 14.40                |
| 498 | P62304     | Small nuclear ribonucleoprotein E                | SNRPE     | 2                             | 3                       | 29.3                      | 1.005                           | 2.68                 |
| 499 | Q96FW1     | Ubiquitin thioesterase OTUB1                     | OTUB1     | 7                             | 5                       | 19.6                      | 1.005                           | 27.30                |
| 500 | P27449     | V-type proton ATPase 16 kDa proteolipid subunit  | ATP6V0C   | 1                             | 2                       | 31.6                      | 1.004                           | 1.53                 |
| 501 | P07900     | Heat shock protein HSP 90-alpha                  | HSP90AA1  | 7                             | 48                      | 49.6                      | 1.004                           | 47.25                |
| 502 | Q15005     | Signal peptidase complex subunit 2               | SPCS2     | 5                             | 6                       | 38.2                      | 1.003                           | 41.25                |
| 503 | Q9Y5Q9     | General transcription factor 3C polypeptide 3    | GTF3C3    | 5                             | 4                       | 6.0                       | 1.003                           | 5.61                 |
| 504 | Q9Y265     | RuvB-like 1                                      | RUVBL1    | 6                             | 9                       | 27.0                      | 1.003                           | 38.91                |
| 505 | Q15773     | Myeloid leukemia factor 2                        | MLF2      | 4                             | 2                       | 15.7                      | 1.001                           | 34.57                |

a) Indicates the number of proteins identified by MS.

b) Indicates the number of peptides identified per protein by MS.

c) The percent coverage of identified peptides out of the full protein.

d) The ratio of ErbB2-digi/ErbB2; represents the quantification of proteins in MCF7-p95ErbB2 cells treated with digitonin compared with untreated MCF7-p95ErbB2 cells. The experiment was performed twice with comparable results.

e) Variability gives the relative deviation of quantified peptide ratios from one protein.
